# Supplementary material for: Synthesis, structural and theoretical studies of dithiodiglycolamide compounds of palladium(ii)
Source: Royal Society of Chemistry journal article supplement (doi:10.1039/c4dt03814b), 2015-01-01
Supplement: c4dt03814b1.pdf [file c4dt03814b1.pdf]

## **Synthesis, Structural and Theoretical Studies of Dithiodiglycolamide Compounds of Palladium (II)**

Balgovind Vats<sup>1</sup>, S. Kannan<sup>1\*</sup>, Mahesh Sundararajan<sup>2\*</sup>, Mukesh Kumar<sup>3</sup> and M. G. B. Drew<sup>4</sup>

## Optimized Coordinates of Pd-nitrates in *cis* and *trans* isomers

### *cis*-[Pd(NO<sub>3</sub>)<sub>2</sub>(H<sub>2</sub>O)<sub>2</sub>]

|    |            |            |            |
|----|------------|------------|------------|
| Pd | -0.0000525 | -0.3423654 | 0.0000000  |
| O  | 1.4208802  | -1.9490511 | -0.0000000 |
| O  | -1.4209345 | -1.9493952 | -0.0000000 |
| O  | 1.2627420  | 1.2363678  | -0.0000000 |
| O  | 3.1686334  | 0.0314086  | 0.0000000  |
| O  | -1.2627653 | 1.2363698  | -0.0000000 |
| O  | -3.1686483 | 0.0313844  | 0.0000000  |
| O  | -3.1932641 | 2.2268685  | 0.0000000  |
| O  | 3.1932949  | 2.2268582  | 0.0000000  |
| N  | -2.6169700 | 1.1521919  | 0.0000000  |
| N  | 2.6169566  | 1.1520836  | 0.0000000  |
| H  | -2.0091130 | -1.7193393 | 0.7509854  |
| H  | -2.0091130 | -1.7193393 | -0.7509854 |
| H  | 2.0091767  | -1.7191769 | -0.7509612 |
| H  | 2.0091767  | -1.7191769 | 0.7509612  |

### *trans*-[Pd(NO<sub>3</sub>)<sub>2</sub>(H<sub>2</sub>O)<sub>2</sub>]

|    |            |            |            |
|----|------------|------------|------------|
| Pd | -0.0003645 | -0.0004607 | 0.0004046  |
| N  | 0.4526779  | -0.1485355 | 2.9778434  |
| O  | -0.4244248 | -0.2777228 | 1.9661330  |
| O  | 1.6729514  | 0.0716106  | 2.7262129  |
| O  | -0.0022148 | -0.2574605 | 4.1000019  |
| N  | -0.4525226 | 0.1482621  | -2.9770943 |
| O  | 0.4242555  | 0.2777202  | -1.9651097 |
| O  | -1.6725067 | -0.0726840 | -2.7255323 |
| O  | 0.0023856  | 0.2576627  | -4.0989338 |
| O  | 2.0413204  | -0.2512796 | 0.2280343  |
| H  | 2.5324479  | 0.4277819  | -0.2715446 |
| O  | -2.0417686 | 0.2521080  | -0.2285525 |
| H  | -2.5336582 | -0.4278471 | 0.2691570  |
| H  | -2.1054672 | 0.0645910  | -1.2346554 |
| H  | 2.1068889  | -0.0637463 | 1.2336355  |

## Optimized Coordinates of Pd-complexes with dithiodiglycolamide ligand

### [PdL<sub>1</sub>(Che)]<sup>2+</sup>

|    |            |            |            |
|----|------------|------------|------------|
| Pd | -0.0096070 | -0.8782384 | -0.0465071 |
| C  | -0.8043064 | -0.1123116 | 2.9324235  |
| C  | 0.5582550  | 0.4821879  | 2.5828183  |
| H  | -1.4799434 | 0.6554680  | 3.3332575  |
| H  | -0.7276294 | -0.9139335 | 3.6803322  |
| H  | 1.1188498  | 0.7121874  | 3.5006662  |
| H  | 0.4719088  | 1.3826461  | 1.9637406  |

|   |            |            |            |
|---|------------|------------|------------|
| S | -1.6706871 | -0.9895545 | 1.4979857  |
| S | 1.5485237  | -0.7926608 | 1.5993915  |
| C | -2.7335300 | 0.2676928  | 0.5895828  |
| H | -2.2908971 | 1.2668176  | 0.7061389  |
| H | -3.7298812 | 0.2422187  | 1.0420103  |
| C | -2.6906755 | -0.1447722 | -0.8820506 |
| O | -1.5880000 | -0.5923463 | -1.3740062 |
| N | -3.7675221 | -0.0246394 | -1.6475380 |
| C | 2.8030494  | 0.2136257  | 0.6286198  |
| H | 3.7796757  | 0.0279816  | 1.0870937  |
| H | 2.5446913  | 1.2771215  | 0.7361769  |
| C | 2.7126265  | -0.1975559 | -0.8389905 |
| O | 1.5781315  | -0.5525662 | -1.3328559 |
| N | 3.7930827  | -0.1574070 | -1.6084128 |
| C | -3.7306166 | -0.4738392 | -3.0551004 |
| H | -4.6456006 | -1.0447711 | -3.2576460 |
| H | -2.8523005 | -1.1009756 | -3.2236862 |
| C | -5.0485884 | 0.5585421  | -1.2013791 |
| H | -4.9032812 | 1.2907734  | -0.4013359 |
| H | -5.7375877 | -0.2334092 | -0.8749491 |
| C | 3.7208654  | -0.6019235 | -3.0157416 |
| H | 2.7945363  | -1.1555625 | -3.1845964 |
| H | 4.5869768  | -1.2450362 | -3.2173044 |
| C | 5.1135854  | 0.3327442  | -1.1669222 |
| H | 5.0273625  | 1.0401990  | -0.3367457 |
| H | 5.5772944  | 0.8622910  | -2.0074514 |
| H | -3.6951691 | 0.4009096  | -3.7188667 |
| H | -5.4955000 | 1.0832915  | -2.0536825 |
| H | 5.7584489  | -0.5110735 | -0.8829389 |
| H | 3.7564865  | 0.2725871  | -3.6797984 |

$[(\text{PdL}_1(\text{H}_2\text{O})_2)]^{2+}$

|    |            |            |            |
|----|------------|------------|------------|
| Pd | 0.0521408  | 0.1207923  | 0.2300257  |
| S  | -2.0481866 | 0.7709417  | 0.9346639  |
| S  | -0.2894582 | 1.2479250  | -1.7706977 |
| O  | -1.6848493 | -0.8466922 | 3.3259467  |
| C  | -2.0424894 | 1.4392085  | 2.6801851  |
| H  | -1.0757829 | 1.9196811  | 2.8841854  |
| H  | -2.8422946 | 2.1886135  | 2.7086672  |
| C  | -2.2626429 | 2.3396584  | -0.0501034 |
| H  | -3.3081208 | 2.6585710  | 0.0735200  |
| H  | -1.5956520 | 3.1152370  | 0.3462001  |
| C  | -2.2594318 | 0.2408945  | 3.6118829  |
| N  | 2.9469451  | 3.2856333  | -2.8435552 |
| N  | -3.0521195 | 0.3717163  | 4.6785737  |
| C  | 0.7964660  | 2.7697012  | -1.7473402 |
| H  | 0.3005661  | 3.4844239  | -2.4161538 |
| H  | 0.8459460  | 3.1898154  | -0.7334854 |

|   |            |            |            |
|---|------------|------------|------------|
| C | -1.9747926 | 2.0040012  | -1.5014275 |
| H | -2.0499769 | 2.8913681  | -2.1445129 |
| H | -2.6684698 | 1.2470992  | -1.8942089 |
| C | 2.1944510  | 2.3609195  | -2.2379447 |
| C | 2.5428798  | 4.6834256  | -3.0645560 |
| H | 1.8312382  | 5.0263858  | -2.3060672 |
| C | -3.7293643 | 1.6138069  | 5.0873489  |
| H | -3.1928898 | 2.5034509  | 4.7427569  |
| C | 4.2760821  | 2.9187933  | -3.3685136 |
| H | 4.3348854  | 3.2191033  | -4.4232573 |
| C | -3.2984839 | -0.7948631 | 5.5485907  |
| H | -4.3812375 | -0.8965579 | 5.7003568  |
| O | 2.5890069  | 1.1779988  | -2.0665820 |
| H | -2.9012591 | -1.6957736 | 5.0760500  |
| H | -2.8108924 | -0.6384821 | 6.5206177  |
| H | -3.7451198 | 1.6478811  | 6.1832936  |
| H | -4.7676120 | 1.6298601  | 4.7246929  |
| H | 4.4188572  | 1.8395497  | -3.2810338 |
| H | 5.0545657  | 3.4446147  | -2.7989616 |
| H | 2.1155783  | 4.8134367  | -4.0699863 |
| H | 3.4355975  | 5.3150395  | -2.9835930 |
| O | 0.4540026  | -0.7677758 | 2.0542856  |
| O | 1.8915961  | -0.6116212 | -0.4424765 |
| H | 2.2500689  | 0.0970170  | -1.1166972 |
| H | 1.8265094  | -1.4580444 | -0.9275218 |
| H | -0.4211114 | -0.9148915 | 2.6183115  |
| H | 1.0067801  | -1.5715804 | 2.0325293  |

[PdL<sub>1</sub>(NO<sub>3</sub>)]<sup>1+</sup>

|    |            |            |            |
|----|------------|------------|------------|
| Pd | -0.3979812 | 0.2452032  | 0.1005402  |
| S  | -2.6105146 | 0.7053270  | 0.5965979  |
| S  | -0.7311143 | 1.2149574  | -1.9769969 |
| O  | -2.4744814 | -0.9180738 | 2.6788550  |
| C  | -2.6951342 | 1.4219255  | 2.3007146  |
| H  | -1.8754992 | 2.1364337  | 2.4507748  |
| H  | -3.6574358 | 1.9503921  | 2.3744320  |
| C  | -2.8348663 | 2.2575503  | -0.4210689 |
| H  | -3.8962117 | 2.5404496  | -0.3642285 |
| H  | -2.2244596 | 3.0688326  | -0.0042728 |
| C  | -2.6072483 | 0.1886786  | 3.2191998  |
| N  | 1.2549928  | 4.3464038  | -3.5075103 |
| N  | -2.6756491 | 0.3844901  | 4.5579663  |
| C  | 0.3756259  | 2.7006989  | -1.8721225 |
| H  | 0.0923250  | 3.3235021  | -1.0125263 |
| H  | 1.3698627  | 2.2768543  | -1.6811295 |
| C  | -2.4486194 | 1.9236745  | -1.8468617 |
| H  | -2.4634827 | 2.7857242  | -2.5252786 |
| H  | -3.0868112 | 1.1373013  | -2.2739323 |

|   |            |            |            |
|---|------------|------------|------------|
| C | 0.2632098  | 3.4717909  | -3.2043993 |
| C | 2.4303455  | 4.6183062  | -2.6804270 |
| H | 2.3279028  | 4.1911378  | -1.6781776 |
| C | -2.8489934 | 1.6802191  | 5.2101856  |
| H | -2.9195710 | 2.4917690  | 4.4787564  |
| C | 1.1944735  | 5.0752180  | -4.7796181 |
| H | 1.1408998  | 6.1573143  | -4.5905229 |
| C | -2.5792716 | -0.7735160 | 5.4531267  |
| H | -3.4987434 | -0.8627279 | 6.0499056  |
| O | -0.7260893 | 3.2708584  | -3.9230275 |
| H | -2.4437684 | -1.6759668 | 4.8504625  |
| H | -1.7228460 | -0.6491654 | 6.1317976  |
| H | -1.9970881 | 1.8867488  | 5.8758545  |
| H | -3.7689901 | 1.6802464  | 5.8141757  |
| H | 0.3062294  | 4.7530604  | -5.3300205 |
| H | 2.0954379  | 4.8606462  | -5.3727182 |
| H | 2.5539050  | 5.7052863  | -2.5694152 |
| H | 3.3402015  | 4.2122053  | -3.1495078 |
| O | 0.4606254  | -0.6941629 | 1.7904505  |
| N | 1.6130823  | -0.8389650 | 1.1867876  |
| O | 1.6001528  | -0.3513358 | -0.0433193 |
| O | 2.5751976  | -1.3522200 | 1.6802583  |

$[(\text{PdL}_1(\text{NO}_3)_2)]^0$

|    |            |            |            |
|----|------------|------------|------------|
| Pd | 1.1124482  | 0.3317705  | 1.2171140  |
| S  | -1.1753943 | 0.5508098  | 1.5796924  |
| S  | 0.7566644  | 0.7676512  | -1.0405269 |
| O  | -3.3815927 | 3.1437308  | 2.0874240  |
| C  | -1.4617972 | 1.9223522  | 2.7997858  |
| H  | -1.0213444 | 1.5524286  | 3.7293350  |
| H  | -0.9209405 | 2.8079912  | 2.4518658  |
| C  | -1.7588400 | 1.3999693  | 0.0192437  |
| H  | -2.8502598 | 1.2868820  | -0.0229574 |
| H  | -1.5431589 | 2.4721486  | 0.0981933  |
| C  | -2.9481851 | 2.2879968  | 2.8709329  |
| N  | 2.1450322  | 3.2277880  | -3.4259956 |
| N  | -3.7311484 | 1.6520301  | 3.7940620  |
| C  | 1.1046971  | 2.5846044  | -1.2539151 |
| H  | 0.3364709  | 3.1528204  | -0.7173451 |
| H  | 2.0678684  | 2.7278247  | -0.7572337 |
| C  | -1.0964812 | 0.7589686  | -1.1792624 |
| H  | -1.3279446 | 1.3013484  | -2.1077930 |
| H  | -1.3620227 | -0.3010779 | -1.2924899 |
| C  | 1.0025577  | 2.9340021  | -2.7366053 |
| C  | 3.5149926  | 3.2076278  | -2.9130844 |
| H  | 3.5685078  | 2.8866003  | -1.8698693 |
| C  | -3.2941338 | 0.6209539  | 4.7353733  |
| H  | -3.2573392 | 1.0219011  | 5.7616518  |

|   |            |            |            |
|---|------------|------------|------------|
| C | 2.0286306  | 3.5905156  | -4.8388278 |
| H | 2.4758458  | 4.5819779  | -5.0078022 |
| C | -5.1314499 | 2.0547019  | 3.9164282  |
| H | -5.3318058 | 2.4111512  | 4.9389360  |
| O | -0.1223245 | 2.9363132  | -3.2619863 |
| H | -5.3309480 | 2.8571647  | 3.2000838  |
| H | -5.7927374 | 1.1992429  | 3.7084098  |
| H | -2.3141921 | 0.2093458  | 4.4779959  |
| H | -4.0169201 | -0.2083291 | 4.7182355  |
| H | 0.9696768  | 3.6084386  | -5.1119697 |
| H | 2.5588906  | 2.8548834  | -5.4635029 |
| H | 3.9606367  | 4.2118183  | -2.9918242 |
| H | 4.1232061  | 2.5138537  | -3.5138953 |
| O | 1.7265271  | -0.0431580 | 3.1532928  |
| O | 3.0711295  | -0.1985465 | 0.8001395  |
| N | 0.9561360  | -0.5289710 | 4.1406563  |
| O | 1.5301705  | -0.7640181 | 5.1977926  |
| O | -0.2668436 | -0.7042469 | 3.9336262  |
| N | 3.9712852  | 0.7774403  | 0.5784938  |
| O | 5.1280535  | 0.4093147  | 0.4112552  |
| O | 3.5774047  | 1.9645893  | 0.5483746  |

[PdL<sub>1</sub>(NO<sub>3</sub>)(H<sub>2</sub>O)]<sup>1+</sup>

|    |            |            |            |
|----|------------|------------|------------|
| Pd | -0.1328188 | 0.6824802  | 0.5024127  |
| S  | -2.4174197 | 0.9794765  | 0.7467956  |
| S  | -0.3991359 | 1.5035705  | -1.6821087 |
| O  | -2.9859169 | -0.9514113 | 2.4509563  |
| C  | -2.7075152 | 1.4175043  | 2.5186987  |
| H  | -1.8267105 | 1.9317547  | 2.9215304  |
| H  | -3.5850370 | 2.0803826  | 2.5493030  |
| C  | -2.4484843 | 2.6582235  | -0.0733793 |
| H  | -3.4811671 | 3.0362374  | -0.0361155 |
| H  | -1.7836051 | 3.3544884  | 0.4513295  |
| C  | -2.9610736 | 0.0484028  | 3.1816121  |
| N  | 2.9220842  | 3.0929639  | -3.1578841 |
| N  | -3.1538015 | 0.0251579  | 4.5214819  |
| C  | 0.7981886  | 2.9164300  | -1.9003533 |
| H  | 0.3304698  | 3.6018500  | -2.6175148 |
| H  | 0.9561326  | 3.4342035  | -0.9444836 |
| C  | -2.0233431 | 2.4292957  | -1.5168166 |
| H  | -1.9352795 | 3.3718872  | -2.0717726 |
| H  | -2.7435423 | 1.7916225  | -2.0473458 |
| C  | 2.1093482  | 2.3090273  | -2.4216346 |
| C  | 2.6784498  | 4.5071860  | -3.4576518 |
| H  | 1.9977144  | 4.9623831  | -2.7312505 |
| C  | -3.0517231 | 1.1891742  | 5.3979533  |
| H  | -3.0917493 | 2.1239343  | 4.8288913  |
| C  | 4.1513601  | 2.5239615  | -3.7285148 |

|   |            |            |            |
|---|------------|------------|------------|
| H | 4.1774131  | 2.7310999  | -4.8074568 |
| C | -3.3305354 | -1.2668996 | 5.1919266  |
| H | -4.2478145 | -1.2466863 | 5.7974768  |
| O | 2.3747560  | 1.1143057  | -2.1643222 |
| H | -3.4053957 | -2.0507932 | 4.4331621  |
| H | -2.4701243 | -1.4721085 | 5.8460522  |
| H | -2.1129550 | 1.1641616  | 5.9736662  |
| H | -3.8943637 | 1.1898172  | 6.1039424  |
| H | 4.1593558  | 1.4443790  | -3.5585042 |
| H | 5.0325159  | 2.9789945  | -3.2538591 |
| H | 2.2726954  | 4.6335113  | -4.4733764 |
| H | 3.6324387  | 5.0469525  | -3.3962892 |
| O | -0.0180990 | 0.1584012  | 2.4721775  |
| O | 1.9406401  | 0.4536112  | 0.3208200  |
| N | 0.7238428  | -0.9195518 | 2.8773317  |
| O | 0.6043814  | -1.2031857 | 4.0542945  |
| O | 1.4445308  | -1.5044598 | 2.0485382  |
| H | 2.0846227  | -0.4316313 | 0.7496675  |
| H | 2.2218618  | 0.4766284  | -0.6433226 |

[PdL<sub>2</sub>]<sup>2+</sup>

|    |            |            |            |
|----|------------|------------|------------|
| Pd | -0.1008409 | -0.1621162 | -0.1001387 |
| S  | -2.2558083 | 0.5639555  | 0.6148893  |
| S  | -0.4716898 | 1.0536206  | -2.1339853 |
| O  | -2.4750268 | -0.8576935 | 2.9514577  |
| C  | -2.2727365 | 1.4199264  | 2.2607004  |
| H  | -1.3249758 | 1.9511972  | 2.4186508  |
| H  | -3.0882164 | 2.1545546  | 2.1996626  |
| C  | -2.5231977 | 2.0498352  | -0.4781752 |
| H  | -3.5816152 | 2.3303031  | -0.3706209 |
| H  | -1.8974184 | 2.8822203  | -0.1321736 |
| C  | -2.5263439 | 0.3316940  | 3.3166052  |
| N  | 1.0351281  | 4.5898923  | -3.3092461 |
| N  | -2.7870453 | 0.7271123  | 4.5796123  |
| C  | 0.5257621  | 2.6022375  | -1.9189417 |
| H  | 0.2638817  | 3.0958700  | -0.9737501 |
| H  | 1.5581449  | 2.2358179  | -1.8728350 |
| C  | -2.2136945 | 1.6512445  | -1.9004019 |
| H  | -2.3272059 | 2.4792802  | -2.6128202 |
| H  | -2.8388749 | 0.8142208  | -2.2419632 |
| C  | 0.2636397  | 3.4877992  | -3.1559058 |
| C  | 2.1068752  | 5.0054638  | -2.4049651 |
| H  | 2.2036459  | 4.3240242  | -1.5542797 |
| C  | -2.8623701 | 2.1199093  | 5.0278448  |
| H  | -2.5135470 | 2.8126247  | 4.2556492  |
| C  | 0.8163114  | 5.4612944  | -4.4709005 |
| H  | 0.5350732  | 6.4697454  | -4.1344206 |

|   |            |            |            |
|---|------------|------------|------------|
| C | -3.0571746 | -0.2817404 | 5.6126817  |
| H | -4.0523961 | -0.1083437 | 6.0460060  |
| O | -0.6402827 | 3.1584285  | -3.9401629 |
| S | 2.0523133  | -0.8892772 | -0.8212447 |
| S | 0.2722678  | -1.3751043 | 1.9339952  |
| O | 2.2470977  | 0.4977143  | -3.1803809 |
| C | 2.0493653  | -1.7698741 | -2.4542542 |
| H | 1.1027821  | -2.3099469 | -2.5879047 |
| H | 2.8712038  | -2.4979218 | -2.3961992 |
| C | 2.3362437  | -2.3596461 | 0.2891582  |
| H | 3.3977711  | -2.6286890 | 0.1842235  |
| H | 1.7204765  | -3.2030640 | -0.0480871 |
| C | 2.2801396  | -0.6966821 | -3.5307974 |
| N | -1.2067003 | -4.9274929 | 3.0988014  |
| N | 2.5019282  | -1.1110963 | -4.7952211 |
| C | -0.7081163 | -2.9338900 | 1.7136014  |
| H | -0.4408360 | -3.4222043 | 0.7671107  |
| H | -1.7434543 | -2.5761827 | 1.6672858  |
| C | 2.0222230  | -1.9510527 | 1.7072345  |
| H | 2.1457821  | -2.7709994 | 2.4273910  |
| H | 2.6356913  | -1.1021061 | 2.0405399  |
| C | -0.4389162 | -3.8225814 | 2.9465729  |
| C | -2.2809472 | -5.3431963 | 2.1978385  |
| H | -2.4112419 | -4.6368726 | 1.3724106  |
| C | 2.5595676  | -2.5106179 | -5.2250797 |
| H | 2.2271133  | -3.1907034 | -4.4345421 |
| C | -0.9726974 | -5.8083229 | 4.2502559  |
| H | -1.8902987 | -5.8838148 | 4.8512037  |
| C | 2.7489349  | -0.1184224 | -5.8494986 |
| H | 1.9716710  | -0.1967134 | -6.6227226 |
| O | 0.4673107  | -3.4944504 | 3.7285780  |
| H | -3.0203598 | -1.2754008 | 5.1596385  |
| H | -2.3029522 | -0.2093804 | 6.4089907  |
| H | -2.2262727 | 2.2522680  | 5.9142067  |
| H | -3.8963909 | 2.3807901  | 5.2993287  |
| H | 0.0155315  | 5.0416653  | -5.0858813 |
| H | 1.7408547  | 5.5293326  | -5.0621695 |
| H | 1.9019519  | 6.0151499  | -2.0186384 |
| H | 3.0669713  | 5.0286342  | -2.9420420 |
| H | 2.7313938  | 0.8817418  | -5.4098036 |
| H | 3.7300713  | -0.3047970 | -6.3086372 |
| H | 3.5855392  | -2.7805199 | -5.5175391 |
| H | 1.9016420  | -2.6525429 | -6.0939703 |
| H | -2.0580956 | -6.3347207 | 1.7757967  |
| H | -3.2301597 | -5.4081822 | 2.7501398  |
| H | -0.1661123 | -5.3919081 | 4.8597655  |
| H | -0.6927547 | -6.8131024 | 3.9018600  |



Optimized coordinates of Pf complexed with thiodiglycolamide ligand

*cis*-[PdL<sub>2</sub>]<sup>2+</sup>

|    |            |            |            |
|----|------------|------------|------------|
| Pd | -0.1611405 | -0.0720192 | 0.7573604  |
| S  | -0.8907654 | 1.4485718  | -0.8053839 |
| S  | -0.8712486 | -2.0745336 | -0.1216415 |
| C  | -0.5388783 | -2.3680476 | -1.9188805 |
| H  | -0.3961475 | -3.4511383 | -2.0406462 |
| H  | 0.3601682  | -1.8115816 | -2.2174644 |
| C  | 0.5482226  | -3.0722068 | 0.6009611  |
| H  | 1.4563790  | -2.8818417 | 0.0105951  |
| H  | 0.2793358  | -4.1316155 | 0.5349629  |
| C  | -1.4619259 | 2.6934677  | 0.4633665  |
| H  | -1.5400639 | 3.6742372  | -0.0209706 |
| H  | -2.4756015 | 2.3671066  | 0.7408053  |
| C  | 0.6326041  | 2.3605170  | -1.3666372 |
| H  | 1.2540251  | 2.6206391  | -0.4988077 |
| H  | 0.2616315  | 3.2789765  | -1.8429363 |
| C  | 1.3779869  | 1.4308767  | -2.3346972 |
| O  | 1.0528545  | 0.2276442  | -2.3578591 |
| N  | 2.3536683  | 1.9656620  | -3.0994722 |
| C  | -1.7994004 | -1.8007178 | -2.5844059 |
| O  | -2.5212522 | -1.0662991 | -1.8825857 |
| N  | -2.0489998 | -2.1192743 | -3.8704718 |
| C  | 0.7559911  | -2.5662554 | 2.0115562  |
| O  | 0.5757386  | -1.3161042 | 2.2461591  |
| N  | 1.1286245  | -3.3786775 | 2.9969844  |
| C  | -0.5461627 | 2.6728517  | 1.6770676  |
| O  | 0.2020670  | 1.6509091  | 1.8804919  |
| N  | -0.5252043 | 3.6978387  | 2.5274770  |
| C  | -3.2802699 | -1.6364907 | -4.5082736 |
| C  | -1.1986693 | -2.9866123 | -4.6890159 |
| C  | 1.4713076  | -4.8003909 | 2.8258207  |
| C  | 1.2688382  | -2.8614788 | 4.3710080  |
| C  | -1.3741519 | 4.8943582  | 2.4065293  |
| C  | 0.3712508  | 3.6801033  | 3.6984793  |
| C  | 2.7750142  | 3.3693393  | -3.0824801 |
| C  | 3.1037613  | 1.1041614  | -4.0228718 |
| H  | 2.3326611  | -2.7314596 | 4.6140525  |
| H  | 0.8283597  | -3.5916711 | 5.0618229  |
| H  | 0.7526669  | -1.9028556 | 4.4602525  |
| H  | 1.6736327  | -5.0436320 | 1.7793347  |
| H  | 0.6589805  | -5.4351063 | 3.2077862  |
| H  | 2.3819218  | -5.0078463 | 3.4016881  |
| H  | -0.1931953 | -3.0755302 | -4.2640785 |
| H  | -1.0986113 | -2.5483917 | -5.6910607 |
| H  | -1.6412969 | -3.9895111 | -4.7921306 |
| H  | -3.8549741 | -1.0568633 | -3.7806908 |
| H  | -3.8784285 | -2.4924406 | -4.8522834 |

|   |            |            |            |
|---|------------|------------|------------|
| H | -3.0309214 | -1.0058287 | -5.3733621 |
| H | 2.7162456  | 3.7854662  | -4.0983009 |
| H | 2.1449788  | 3.9744054  | -2.4240904 |
| H | 3.8153980  | 3.4466871  | -2.7338424 |
| H | 4.1802365  | 1.2044569  | -3.8258051 |
| H | 2.7957405  | 0.0662426  | -3.8758645 |
| H | 2.9029757  | 1.4045436  | -5.0613407 |
| H | -0.7824773 | 5.7492596  | 2.0483669  |
| H | -1.7728189 | 5.1361936  | 3.3998741  |
| H | -2.2211209 | 4.7230145  | 1.7364969  |
| H | 1.0489214  | 2.8260461  | 3.6328443  |
| H | -0.2283864 | 3.6088762  | 4.6163231  |
| H | 0.9463941  | 4.6154018  | 3.7183024  |

*trans*-[PdL<sub>2</sub>]<sup>2+</sup>

|    |            |            |            |
|----|------------|------------|------------|
| Pd | 0.0754208  | 0.0494988  | -0.0041058 |
| S  | -0.5141742 | 2.1409550  | -0.9077887 |
| S  | 0.6691815  | -2.0418252 | 0.8941992  |
| C  | 2.4480906  | -1.9519415 | 0.3039688  |
| H  | 2.5010113  | -2.3168339 | -0.7320395 |
| H  | 3.0388312  | -2.6158207 | 0.9452970  |
| C  | 0.1461694  | -3.4986802 | -0.1301316 |
| H  | 0.9184148  | -4.2690220 | 0.0038020  |
| H  | 0.0945398  | -3.2108904 | -1.1891737 |
| C  | -2.3014233 | 2.0491054  | -0.3435022 |
| H  | -2.3721867 | 2.4319469  | 0.6851970  |
| H  | -2.8894861 | 2.6958705  | -1.0049852 |
| C  | -0.0054950 | 3.5960553  | 0.1262357  |
| H  | 0.0197659  | 3.3095293  | 1.1864598  |
| H  | -0.7701003 | 4.3706430  | -0.0267836 |
| C  | 1.3837464  | 3.9711930  | -0.4115462 |
| O  | 1.9659178  | 3.1294232  | -1.1181322 |
| N  | 1.8803311  | 5.1862638  | -0.0932199 |
| C  | 2.9116698  | -0.5118991 | 0.3395650  |
| O  | 2.0436521  | 0.4369515  | 0.3316090  |
| N  | 4.2037490  | -0.1979659 | 0.3366926  |
| C  | -1.2300443 | -3.8773249 | 0.4373112  |
| O  | -1.8116033 | -3.0242557 | 1.1307336  |
| N  | -1.7169893 | -5.1058168 | 0.1580217  |
| C  | -2.7588317 | 0.6065659  | -0.3624470 |
| O  | -1.8912357 | -0.3411482 | -0.3421426 |
| N  | -4.0534950 | 0.3009815  | -0.3638663 |
| C  | -2.9863836 | -5.5317957 | 0.7610901  |
| C  | -1.0456757 | -6.1027923 | -0.6808012 |
| C  | -4.4683773 | -1.1152416 | -0.3234399 |
| C  | -5.1296650 | 1.2965698  | -0.5030253 |

|   |            |            |            |
|---|------------|------------|------------|
| C | 1.2077081  | 6.1687921  | 0.7613108  |
| C | 3.1650630  | 5.6121808  | -0.6626879 |
| C | 4.6053052  | 1.2219257  | 0.2729556  |
| C | 5.3093519  | -1.1640826 | 0.4161167  |
| H | -0.2626840 | -5.6487193 | -1.2971898 |
| H | -1.7813835 | -6.5539712 | -1.3603722 |
| H | -0.6061825 | -6.9025912 | -0.0650534 |
| H | -2.8359850 | -6.4805158 | 1.2951903  |
| H | -3.3223434 | -4.7656722 | 1.4652157  |
| H | -3.7463078 | -5.6810456 | -0.0195239 |
| H | -3.6621072 | -1.7218636 | 0.1023147  |
| H | -4.7066408 | -1.4649889 | -1.3384068 |
| H | -5.3644123 | -1.1919148 | 0.3031724  |
| H | -4.8200142 | 2.2763659  | -0.1272682 |
| H | -5.9857108 | 0.9616445  | 0.0938061  |
| H | -5.4441678 | 1.3833504  | -1.5533740 |
| H | 0.8000721  | 6.9967246  | 0.1611533  |
| H | 0.3993374  | 5.7113725  | 1.3412939  |
| H | 1.9339629  | 6.5826493  | 1.4741901  |
| H | 3.9144916  | 5.7265555  | 0.1340231  |
| H | 3.0367281  | 6.5791250  | -1.1691384 |
| H | 3.5018289  | 4.8635773  | -1.3850274 |
| H | 5.5300542  | 1.2879799  | -0.3117652 |
| H | 3.8141374  | 1.8098757  | -0.2051543 |
| H | 4.7924352  | 1.6020930  | 1.2874853  |
| H | 5.9111086  | -0.9565280 | 1.3115770  |
| H | 4.9474788  | -2.1939200 | 0.4614755  |
| H | 5.9455437  | -1.0548417 | -0.4725998 |

*trans*-[PdL<sub>2</sub>(H<sub>2</sub>O)<sub>2</sub>]<sup>2+</sup>

|    |            |            |            |
|----|------------|------------|------------|
| Pd | -3.1485040 | 0.4384435  | -0.1582079 |
| S  | -2.7290733 | -1.9004705 | -0.4320817 |
| C  | -4.2532646 | -2.9348959 | -0.1080261 |
| C  | -1.6275323 | -2.4704907 | 0.9381392  |
| C  | -5.4832836 | -2.3934505 | -0.8358161 |
| H  | -3.9723938 | -3.9566166 | -0.3830408 |
| H  | -4.4549929 | -2.8827426 | 0.9690692  |
| H  | -1.3772374 | -3.5145451 | 0.7040888  |
| H  | -0.7117889 | -1.8753370 | 0.8060477  |
| C  | -2.1905149 | -2.3191094 | 2.3679635  |
| N  | -6.0550297 | -3.1386856 | -1.7989378 |
| O  | -5.9566657 | -1.2872574 | -0.4721910 |
| N  | -1.4957045 | -2.9233981 | 3.3492529  |
| O  | -3.2455054 | -1.6823048 | 2.5878716  |
| C  | -7.3440964 | -2.7114040 | -2.3691890 |
| C  | -5.5421820 | -4.4284116 | -2.2895005 |
| C  | -0.2547970 | -3.6854835 | 3.1508892  |
| C  | -2.0058707 | -2.8923169 | 4.7302939  |

|   |            |            |            |
|---|------------|------------|------------|
| H | -7.2243675 | -2.5113562 | -3.4431965 |
| H | -8.0821868 | -3.5142846 | -2.2355346 |
| H | -7.6839914 | -1.8070027 | -1.8594113 |
| H | -4.4479831 | -4.4370666 | -2.3404882 |
| H | -5.9171399 | -4.5754787 | -3.3086351 |
| H | -5.8980843 | -5.2634301 | -1.6679648 |
| H | 0.2967137  | -3.3453973 | 2.2683433  |
| H | -0.4622231 | -4.7628194 | 3.0624344  |
| H | 0.3904861  | -3.5293254 | 4.0241918  |
| H | -2.9843151 | -2.4064823 | 4.7447099  |
| H | -1.3073684 | -2.3368534 | 5.3714267  |
| H | -2.0943679 | -3.9211873 | 5.1056519  |
| O | -4.6200210 | 0.0902455  | 1.2238932  |
| H | -5.2834548 | -0.4612046 | 0.6511710  |
| O | -1.6143680 | 0.8328893  | -1.4740722 |
| H | -1.5678548 | 0.2140246  | -2.2259077 |
| H | -4.1755794 | -0.5657351 | 1.8522015  |
| H | -1.6417714 | 1.8537570  | -1.8706210 |
| H | -2.1479534 | 3.0184957  | 1.7623356  |
| C | -2.2967511 | 3.5550594  | 0.8155244  |
| S | -3.7647783 | 2.7161161  | 0.0553083  |
| C | -2.6612951 | 5.0415587  | 0.9982932  |
| H | -1.4141231 | 3.4108059  | 0.1777337  |
| C | -3.9192960 | 3.4368006  | -1.6556968 |
| N | -1.8878334 | 5.7839642  | 1.8203893  |
| O | -3.6475805 | 5.4828054  | 0.3821184  |
| H | -4.3518310 | 2.6231737  | -2.2567680 |
| H | -4.6559932 | 4.2340621  | -1.5402509 |
| C | -2.6290759 | 3.8957620  | -2.3082014 |
| C | -2.2410037 | 7.1891459  | 2.0646532  |
| C | -0.6916679 | 5.3043417  | 2.5152167  |
| N | -2.6083552 | 5.0852026  | -2.9152944 |
| O | -1.6092819 | 3.1350818  | -2.3140030 |
| H | -2.2798644 | 7.3697252  | 3.1478284  |
| H | -1.4859703 | 7.8537471  | 1.6198561  |
| H | -3.2189412 | 7.3951486  | 1.6214587  |
| H | -0.3906882 | 4.3129038  | 2.1623964  |
| H | -0.8662958 | 5.2620107  | 3.6010761  |
| H | 0.1416820  | 5.9955674  | 2.3249060  |
| C | -3.7344739 | 6.0429480  | -2.8905738 |
| C | -1.4193180 | 5.4990573  | -3.6801755 |
| H | -4.0571121 | 6.2289265  | -1.8585322 |
| H | -4.5728578 | 5.6887738  | -3.5060109 |
| H | -3.3770205 | 6.9863085  | -3.3148693 |
| H | -1.7168093 | 5.7162233  | -4.7149326 |
| H | -0.6754204 | 4.6995729  | -3.6664820 |
| H | -0.9958886 | 6.4085447  | -3.2321973 |

*trans*-[PdL<sub>2</sub>(NO<sub>3</sub>)<sub>2</sub>]<sup>0</sup>

|    |           |           |           |
|----|-----------|-----------|-----------|
| Pd | -2.368339 | 0.236098  | -0.528098 |
| S  | -1.727551 | -2.054002 | -0.815213 |
| C  | -3.241441 | -3.040497 | -1.131128 |
| C  | -1.037782 | -2.715345 | 0.786942  |
| C  | -4.451226 | -2.656216 | -0.263162 |
| H  | -3.435597 | -2.877056 | -2.197457 |
| H  | -2.960345 | -4.089252 | -0.953253 |
| H  | -0.244410 | -3.405640 | 0.475036  |
| H  | -0.590327 | -1.841449 | 1.270171  |
| C  | -2.002459 | -3.533175 | 1.642079  |
| N  | -5.647689 | -3.175874 | -0.666957 |
| O  | -4.329514 | -1.939704 | 0.736891  |
| N  | -2.391286 | -3.035660 | 2.851940  |
| O  | -2.319316 | -4.665484 | 1.244536  |
| C  | -6.868762 | -2.765295 | 0.024106  |
| C  | -5.835932 | -3.933309 | -1.903017 |
| C  | -2.338023 | -1.631279 | 3.250847  |
| C  | -3.268126 | -3.867490 | 3.673631  |
| H  | -7.486050 | -2.135506 | -0.635897 |
| H  | -7.448303 | -3.652271 | 0.321296  |
| H  | -6.589939 | -2.190736 | 0.912225  |
| H  | -4.967991 | -4.566238 | -2.119037 |
| H  | -6.025670 | -3.263625 | -2.758094 |
| H  | -6.701969 | -4.596825 | -1.776632 |
| H  | -1.662380 | -1.049693 | 2.618992  |
| H  | -1.993551 | -1.560944 | 4.293472  |
| H  | -3.341325 | -1.184843 | 3.169340  |
| H  | -3.006768 | -3.729288 | 4.732280  |
| H  | -3.141668 | -4.915495 | 3.386305  |
| H  | -4.322458 | -3.580745 | 3.525878  |
| O  | -3.772332 | -0.214715 | -1.963220 |
| O  | -0.864781 | 0.432686  | 0.849294  |
| H  | -1.093461 | 2.771444  | 1.163195  |
| C  | -1.461492 | 3.389136  | 0.331998  |
| S  | -2.975207 | 2.522679  | -0.269498 |
| C  | -1.807819 | 4.802476  | 0.827332  |
| H  | -0.714889 | 3.391106  | -0.470784 |
| C  | -3.004557 | 3.151733  | -2.017727 |
| N  | -0.739479 | 5.589141  | 1.159853  |
| O  | -2.981754 | 5.171641  | 0.943314  |
| H  | -2.087135 | 2.816532  | -2.511015 |
| H  | -3.872403 | 2.662404  | -2.470822 |
| C  | -3.030510 | 4.681166  | -2.106370 |
| C  | -0.980220 | 6.977661  | 1.544116  |
| C  | 0.656350  | 5.220226  | 0.930222  |
| N  | -4.234399 | 5.315041  | -1.992083 |
| O  | -1.965307 | 5.274930  | -2.325008 |
| H  | -0.443484 | 7.207193  | 2.476738  |
| H  | -0.631952 | 7.663626  | 0.754681  |
| H  | -2.055219 | 7.115241  | 1.694444  |

|   |           |           |           |
|---|-----------|-----------|-----------|
| H | 0.811173  | 4.141479  | 1.037038  |
| H | 1.279779  | 5.717907  | 1.685635  |
| H | 1.000066  | 5.535029  | -0.069343 |
| C | -5.456986 | 4.700996  | -1.479586 |
| C | -4.249066 | 6.774968  | -2.037735 |
| H | -5.436136 | 3.610987  | -1.567068 |
| H | -6.317284 | 5.076646  | -2.053069 |
| H | -5.593977 | 4.956537  | -0.416655 |
| H | -5.123017 | 7.112491  | -2.613453 |
| H | -3.328078 | 7.123816  | -2.514248 |
| H | -4.308544 | 7.190270  | -1.018412 |
| N | -5.065873 | 0.183135  | -1.918225 |
| O | -5.830230 | -0.444570 | -2.655829 |
| O | -5.387068 | 1.130421  | -1.186772 |
| N | 0.383133  | 0.742280  | 0.352708  |
| O | 0.508629  | 0.910053  | -0.862592 |
| O | 1.265187  | 0.831575  | 1.205164  |

*trans*-[PdL<sub>2</sub>(H<sub>2</sub>O)(NO<sub>3</sub>)]<sup>1+</sup>

|    |            |            |            |
|----|------------|------------|------------|
| Pd | -2.7468072 | 0.4092480  | -0.7556424 |
| S  | -2.2525454 | -1.8928174 | -1.2162460 |
| C  | -3.5834707 | -3.0241613 | -1.8437790 |
| C  | -1.6551671 | -2.6645558 | 0.3554763  |
| C  | -4.9717821 | -3.0032653 | -1.2174568 |
| H  | -3.6902594 | -2.7019973 | -2.8916311 |
| H  | -3.1230197 | -4.0168234 | -1.8445803 |
| H  | -1.2871106 | -3.6610821 | 0.0747304  |
| H  | -0.7974832 | -2.0365716 | 0.6157418  |
| C  | -2.7204009 | -2.8411262 | 1.4340707  |
| N  | -5.5968050 | -4.1762437 | -1.0297563 |
| O  | -5.5697149 | -1.9105035 | -1.0231041 |
| N  | -2.5356341 | -2.2372189 | 2.6390057  |
| O  | -3.6961132 | -3.5647680 | 1.1742006  |
| C  | -6.9813357 | -4.1787286 | -0.5401155 |
| C  | -4.9087204 | -5.4762710 | -1.0642139 |
| C  | -1.3850825 | -1.4065910 | 3.0128098  |
| C  | -3.4812203 | -2.5255478 | 3.7223414  |
| H  | -7.5580425 | -4.9261744 | -1.0997316 |
| H  | -7.0003691 | -4.4296223 | 0.5307168  |
| H  | -7.4180913 | -3.1878167 | -0.6850309 |
| H  | -4.5576871 | -5.7258630 | -2.0749977 |
| H  | -5.6269857 | -6.2454976 | -0.7636899 |
| H  | -4.0774146 | -5.4824810 | -0.3465155 |
| H  | -0.9992148 | -0.8360581 | 2.1616571  |
| H  | -0.5765295 | -2.0132553 | 3.4505207  |
| H  | -1.7179529 | -0.6855120 | 3.7702339  |
| H  | -2.9509210 | -2.9854929 | 4.5695541  |

|   |            |            |            |
|---|------------|------------|------------|
| H | -4.2475968 | -3.2114385 | 3.3515576  |
| H | -3.9540730 | -1.5934073 | 4.0650935  |
| O | -4.7217990 | 0.3682796  | -1.4365306 |
| O | -0.8778764 | 0.4098117  | 0.0144026  |
| H | -1.3022961 | 2.6615552  | 1.1634705  |
| C | -1.5986800 | 3.4087848  | 0.4159999  |
| S | -3.0855528 | 2.7222702  | -0.4362184 |
| C | -1.9950346 | 4.7624472  | 1.0347974  |
| H | -0.8024230 | 3.5167920  | -0.3310695 |
| C | -2.8302016 | 3.3958698  | -2.1492186 |
| N | -1.0007845 | 5.4497363  | 1.6551378  |
| O | -3.1674147 | 5.1553719  | 0.9586782  |
| H | -1.8959152 | 2.9721887  | -2.5320735 |
| H | -3.6783507 | 3.0202498  | -2.7327906 |
| C | -2.6640545 | 4.9251376  | -2.1231632 |
| C | -1.2847553 | 6.7864711  | 2.1815526  |
| C | 0.4091474  | 5.0589990  | 1.6230065  |
| N | -3.7748779 | 5.7052708  | -2.2388363 |
| O | -1.5142246 | 5.3711623  | -2.0304921 |
| H | -0.8926201 | 6.8700141  | 3.2047808  |
| H | -0.8097874 | 7.5558273  | 1.5528962  |
| H | -2.3674678 | 6.9406897  | 2.1873974  |
| H | 0.5237847  | 3.9717745  | 1.5578485  |
| H | 0.8880434  | 5.3875315  | 2.5546724  |
| H | 0.9354303  | 5.5249318  | 0.7745387  |
| C | -5.1481125 | 5.2367203  | -2.0690727 |
| C | -3.6029665 | 7.1593279  | -2.1841063 |
| H | -5.2554493 | 4.1881045  | -2.3642828 |
| H | -5.8106316 | 5.8332176  | -2.7106407 |
| H | -5.4711953 | 5.3472147  | -1.0214602 |
| H | -4.2789651 | 7.6302685  | -2.9105632 |
| H | -2.5652209 | 7.4042212  | -2.4263624 |
| H | -3.8379655 | 7.5355248  | -1.1758710 |
| N | 0.1529649  | 0.8125270  | -0.8443722 |
| O | -0.1544250 | 1.1855427  | -1.9740086 |
| O | 1.2638867  | 0.7513090  | -0.3441036 |
| H | -5.0772005 | -0.6321267 | -1.2937667 |
| H | -5.2874248 | 0.9311986  | -0.8754936 |
