# Supplementary material for: Synthesis, structural and theoretical studies of dithiodiglycolamide compounds of palladium(ii)
Source: Royal Society of Chemistry journal article supplement (doi:10.1039/c4dt03814b), 2015-01-01
Supplement: c4dt03814b2.pdf [file c4dt03814b2.pdf]

## Supplementary Information

### **Synthesis , structural and theoretical studies of dithiodiglycolamide compounds of palladium (II).**

Balgovind Vats, S. Kannan, M. Sundarajan, Mukesh Kumar and M. G. B. Drew

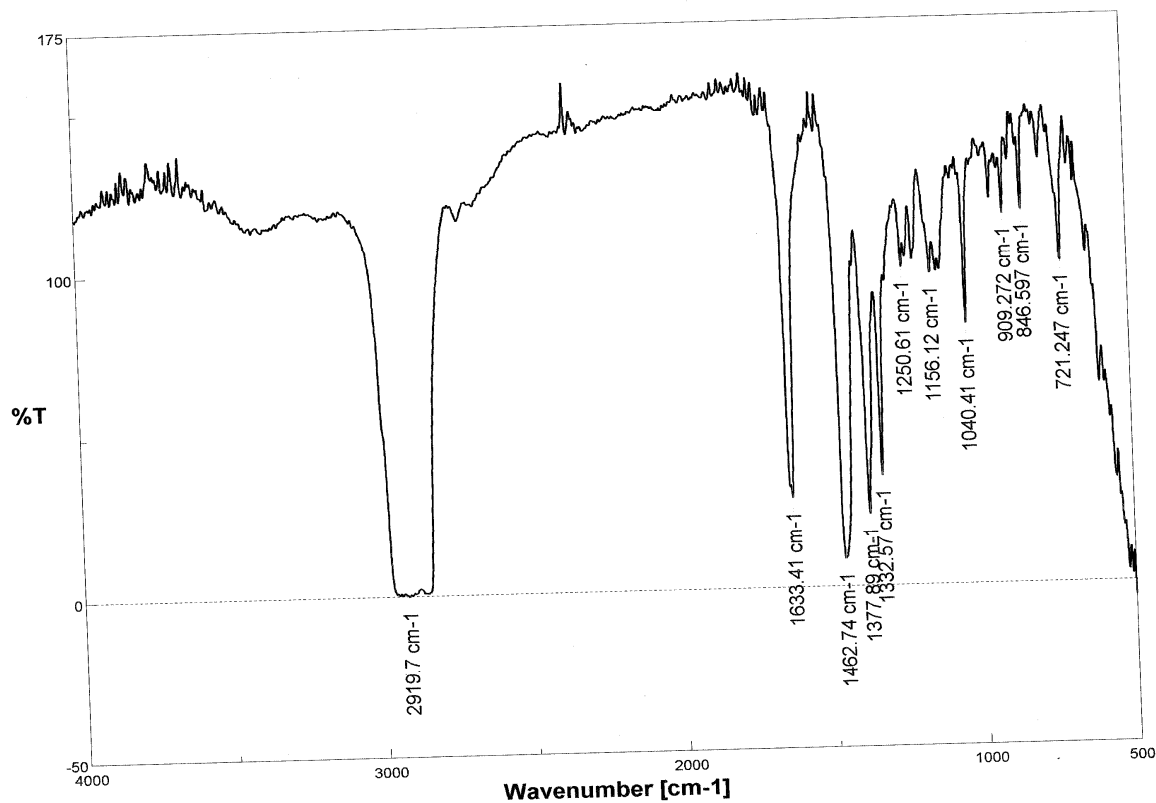

Figure S1: IR spectrum of complex 1

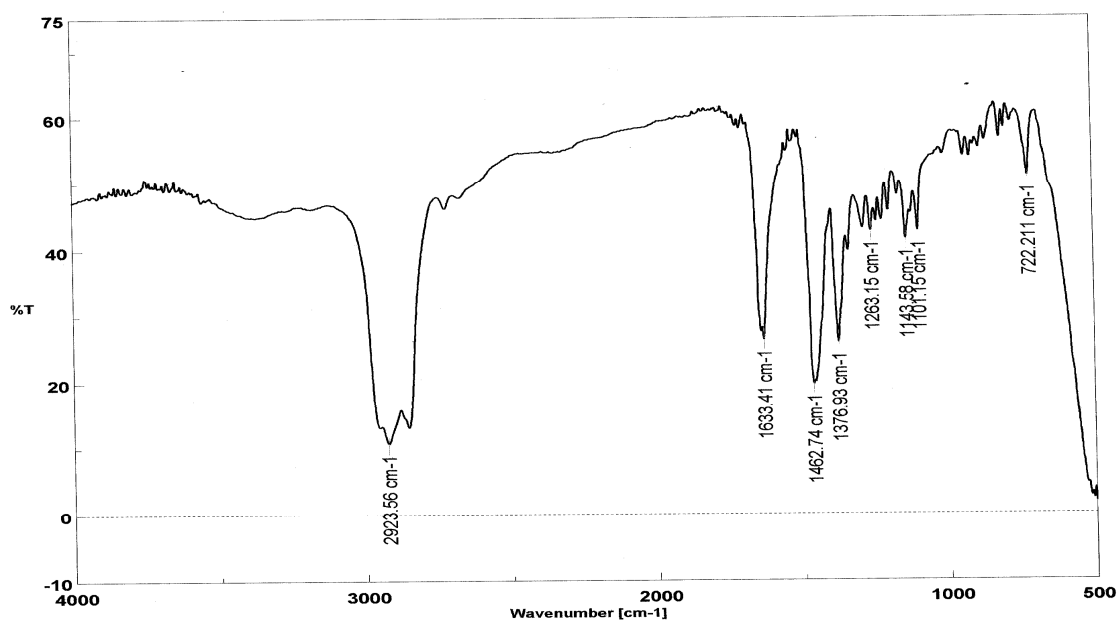

Figure S2: IR spectrum of complex 2

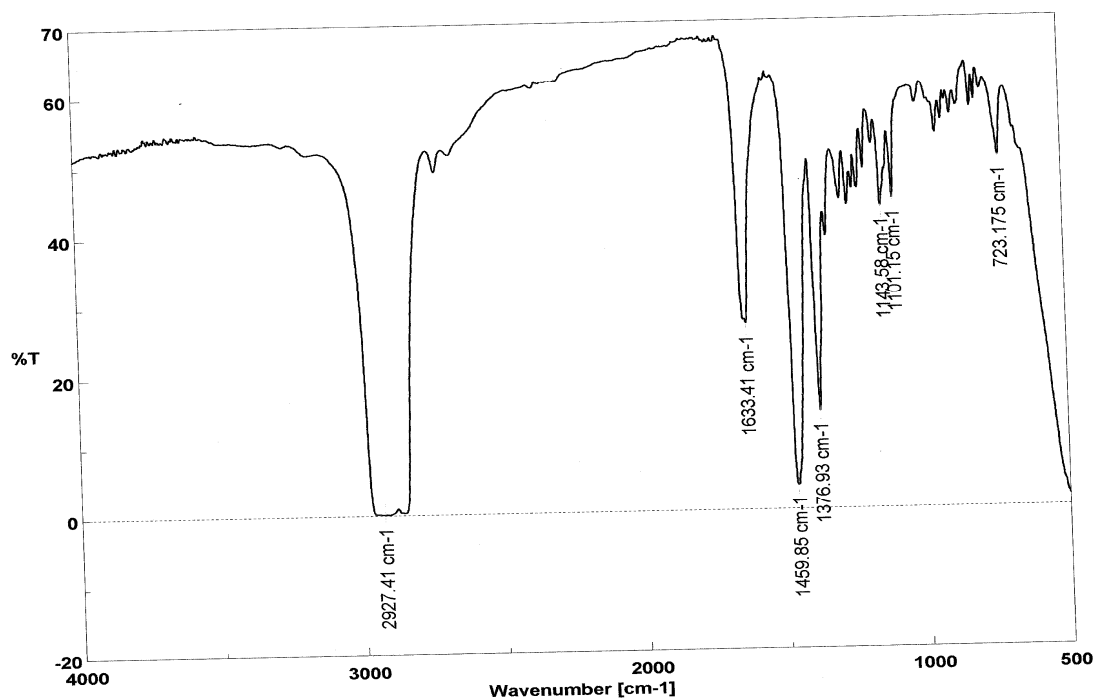

Figure S3: IR spectrum of complex 3

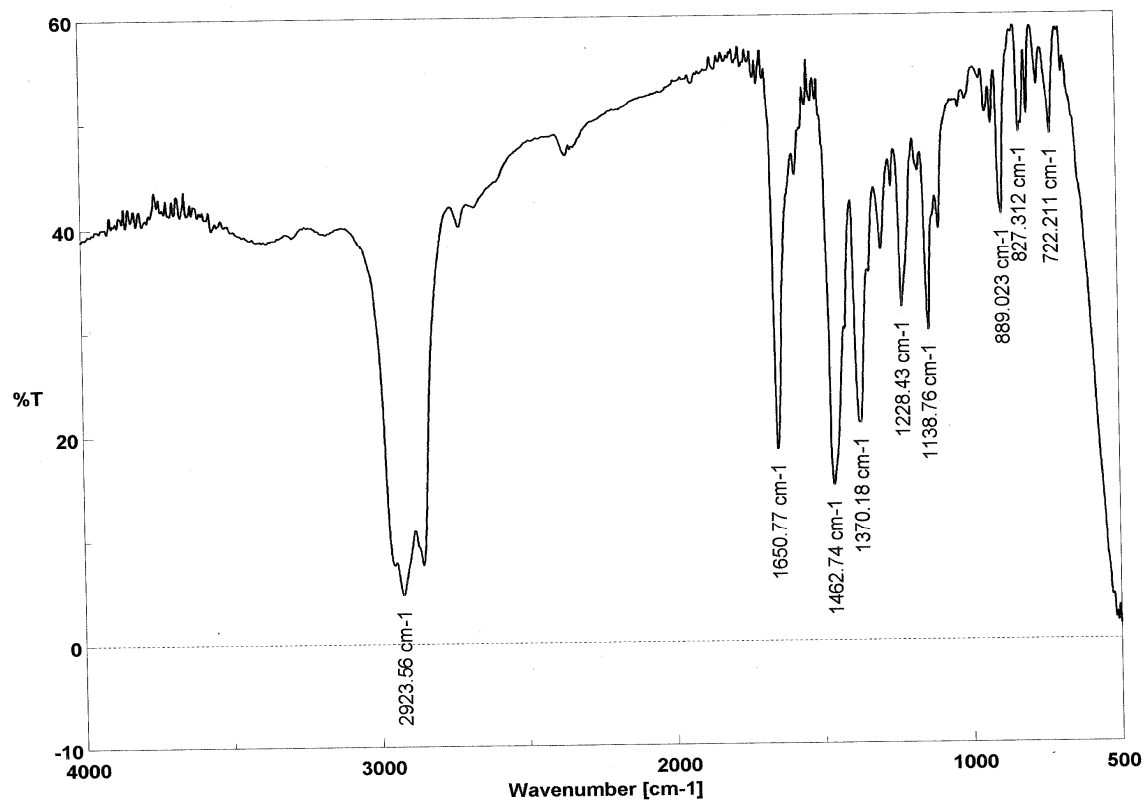

Figure S4: IR spectrum of complex 4

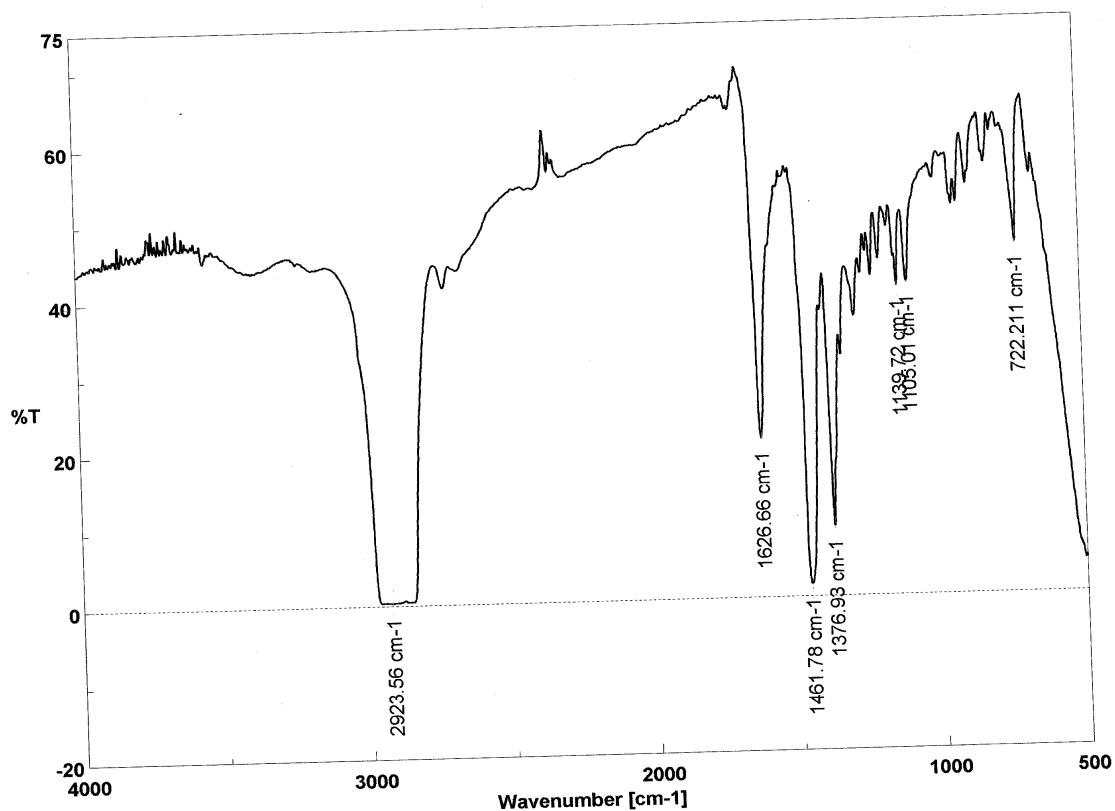

Figure S5: IR spectrum of complex 5

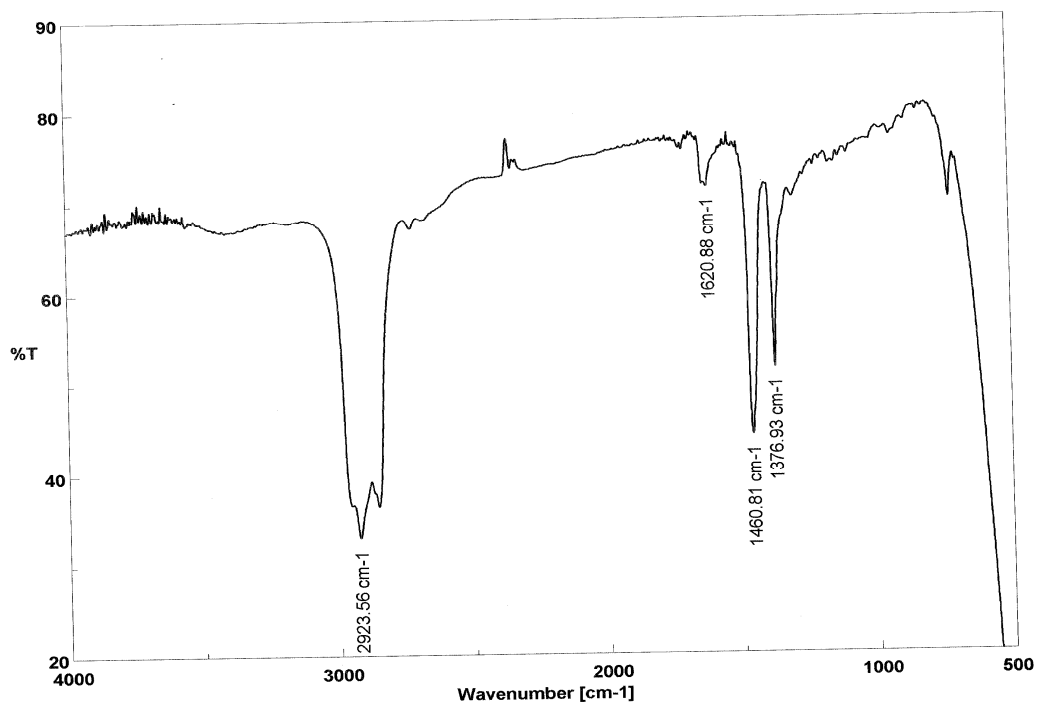

Figure S6: IR spectrum of complex 6

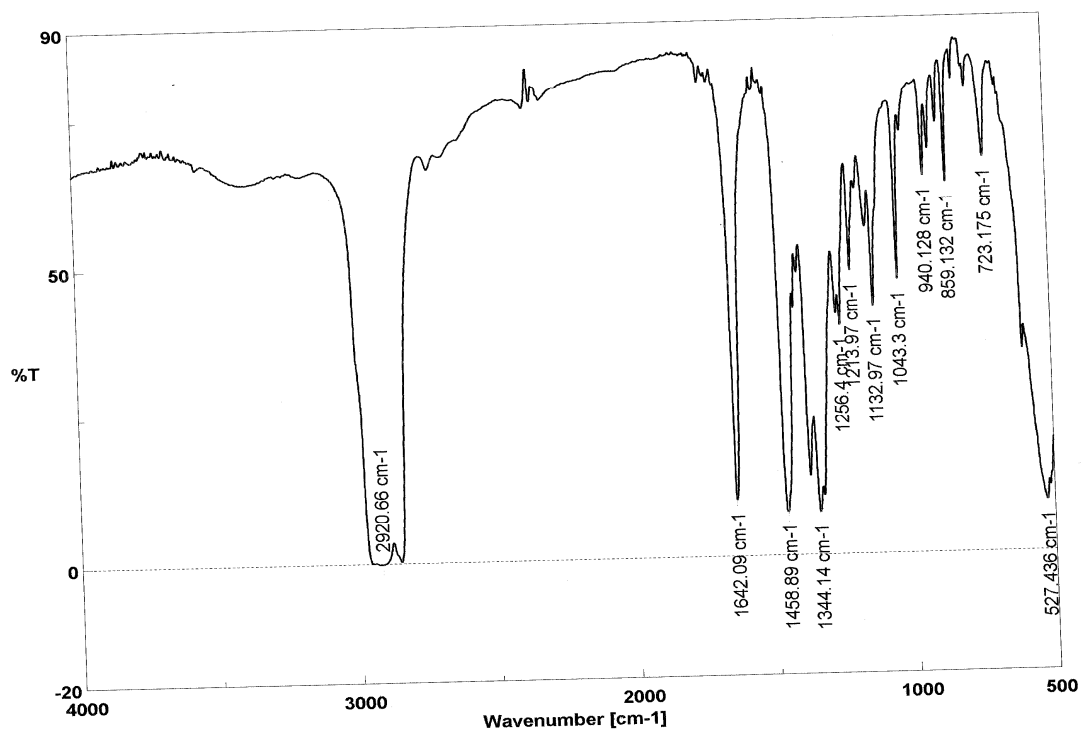

Figure S7: IR spectrum of complex 7

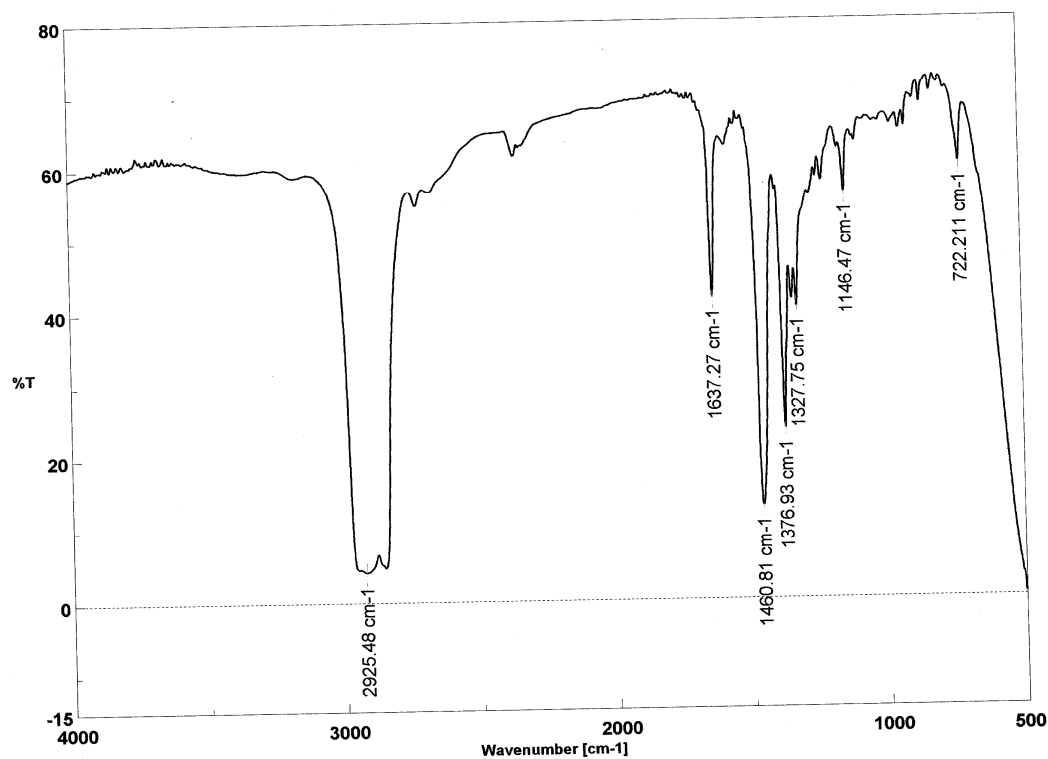

Figure S8: IR spectrum of complex 8

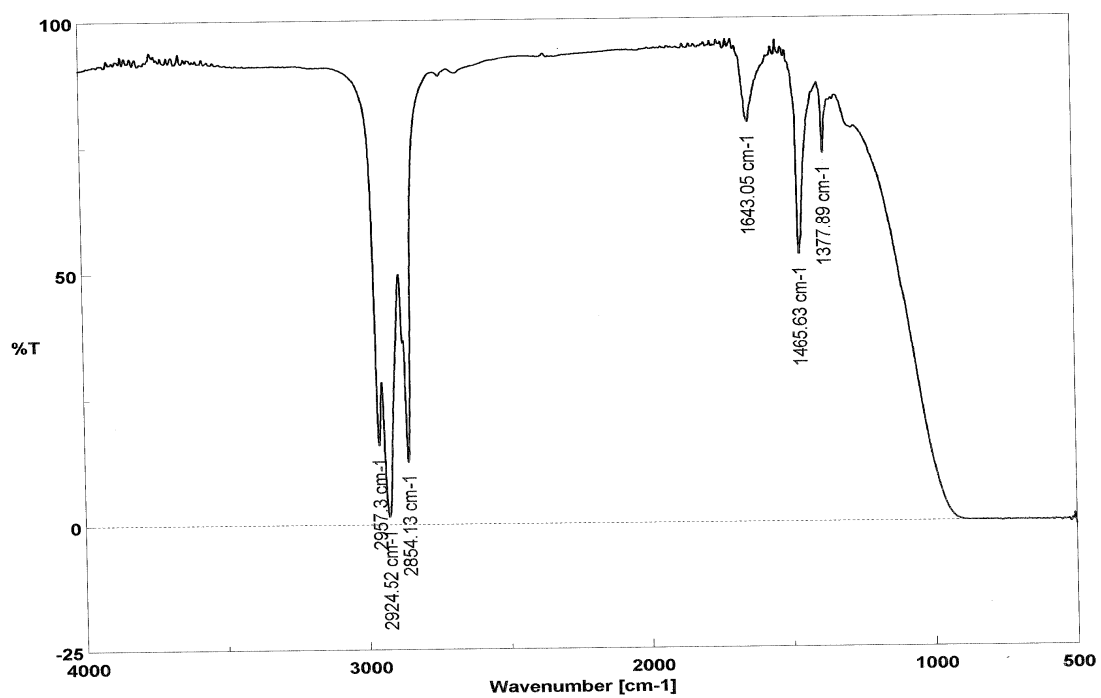

Figure S9: IR spectrum of dodecane layer after palladium extraction with N,N'-dioctyl dithiodiglycolamide ligand from 3M HNO<sub>3</sub>

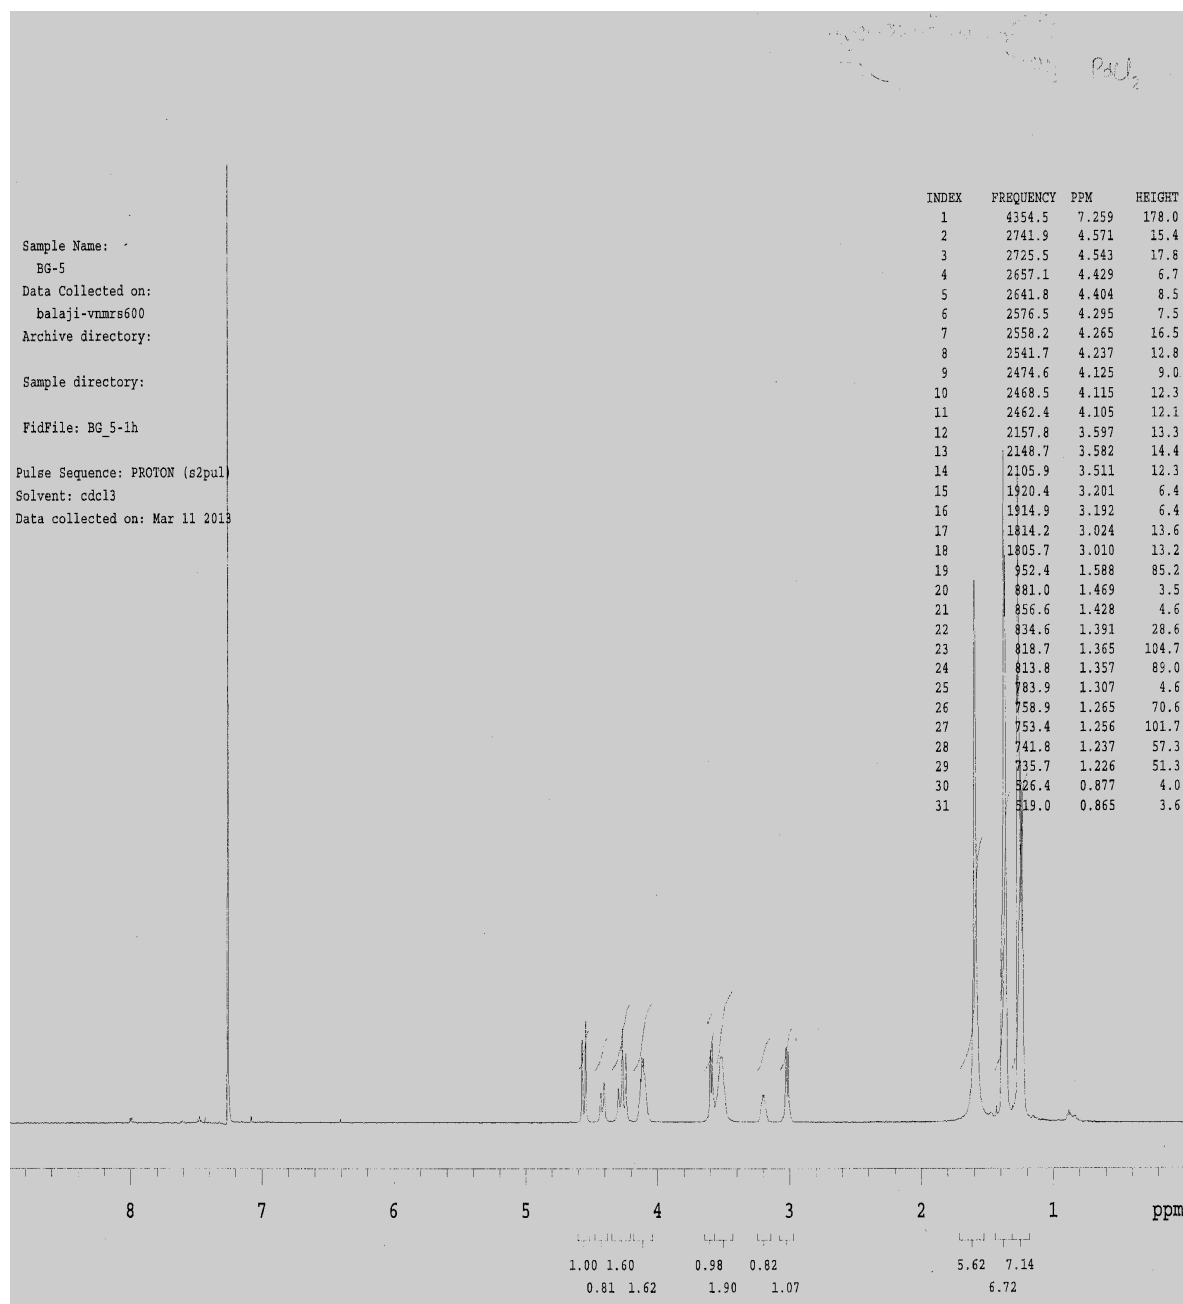

Figure S10: <sup>1</sup>H-NMR spectrum of complex 1

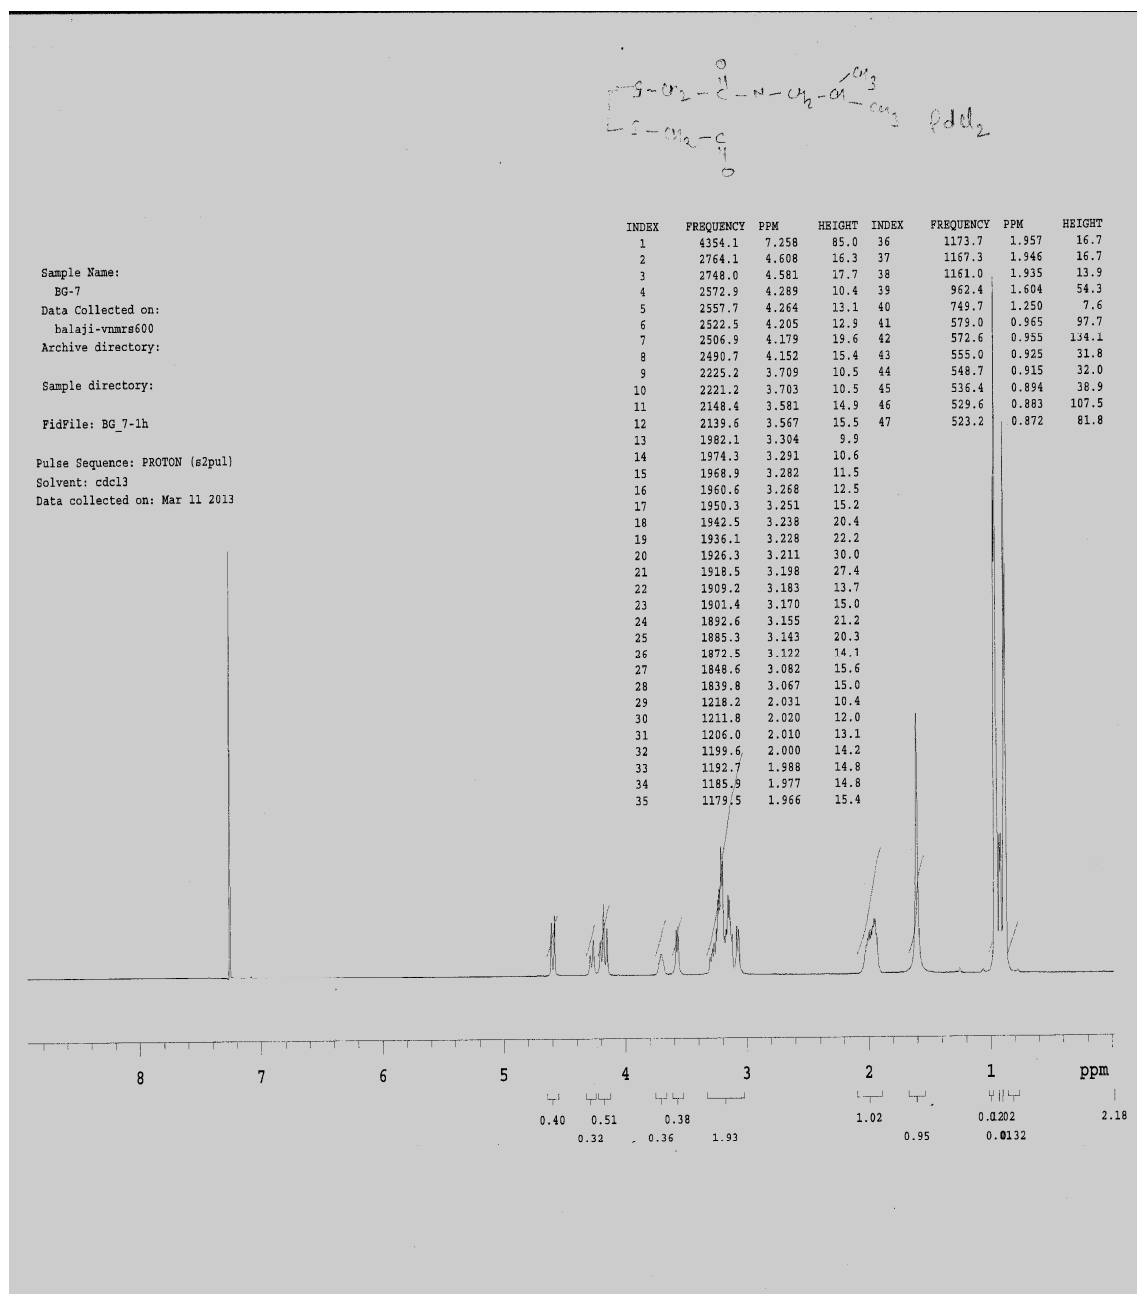

Figure S11:  $^1\text{H}$ -NMR spectrum of complex 2



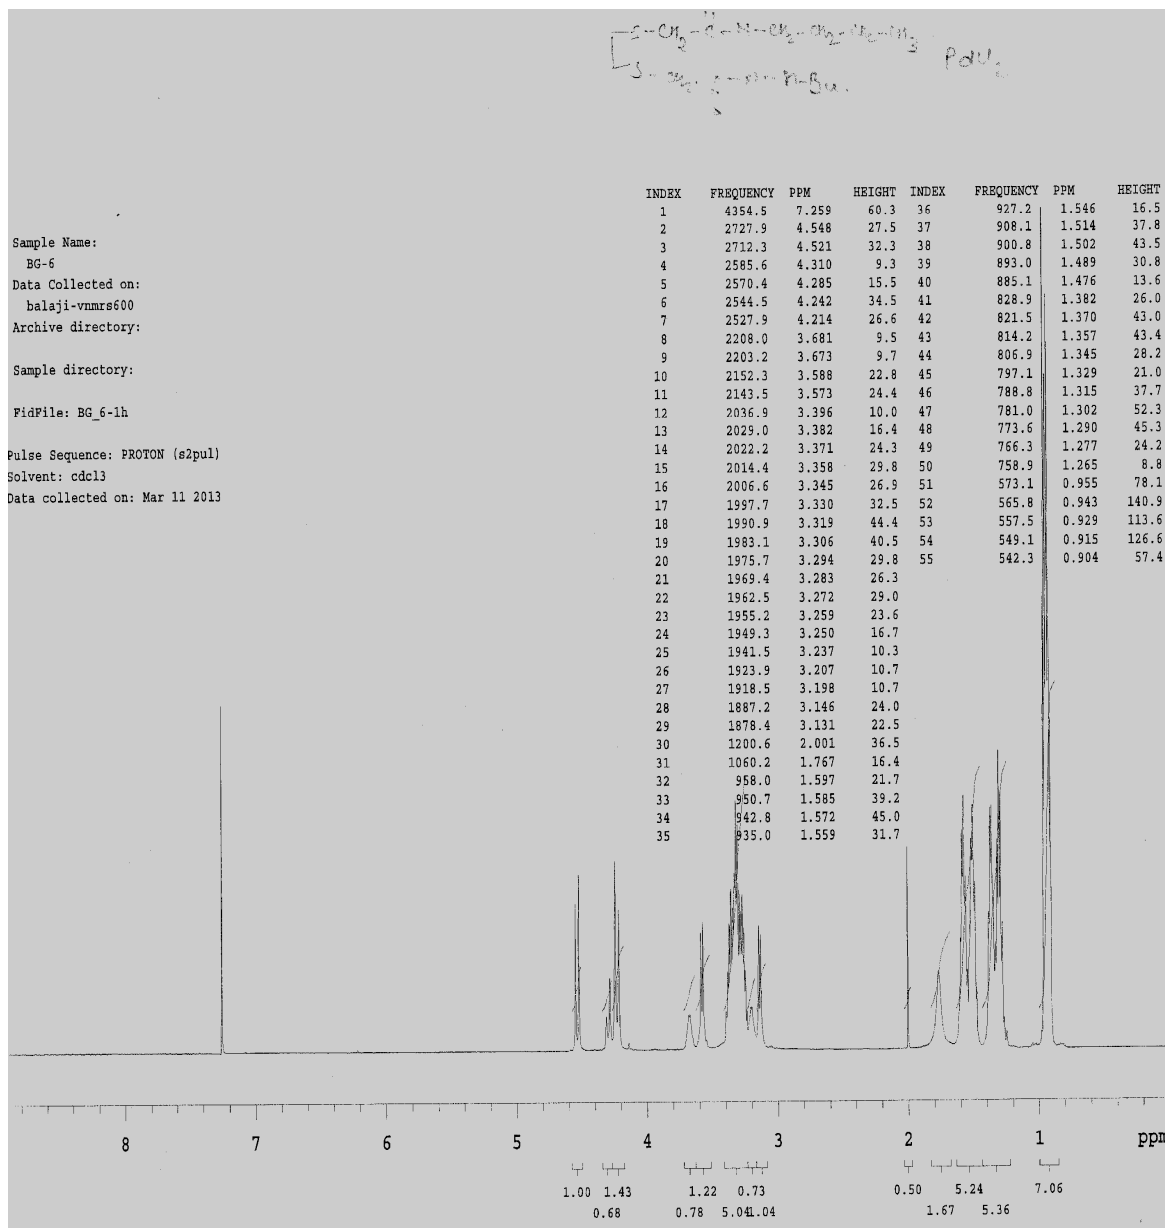

Figure S12:  $^1\text{H}$ -NMR spectrum of complex 3

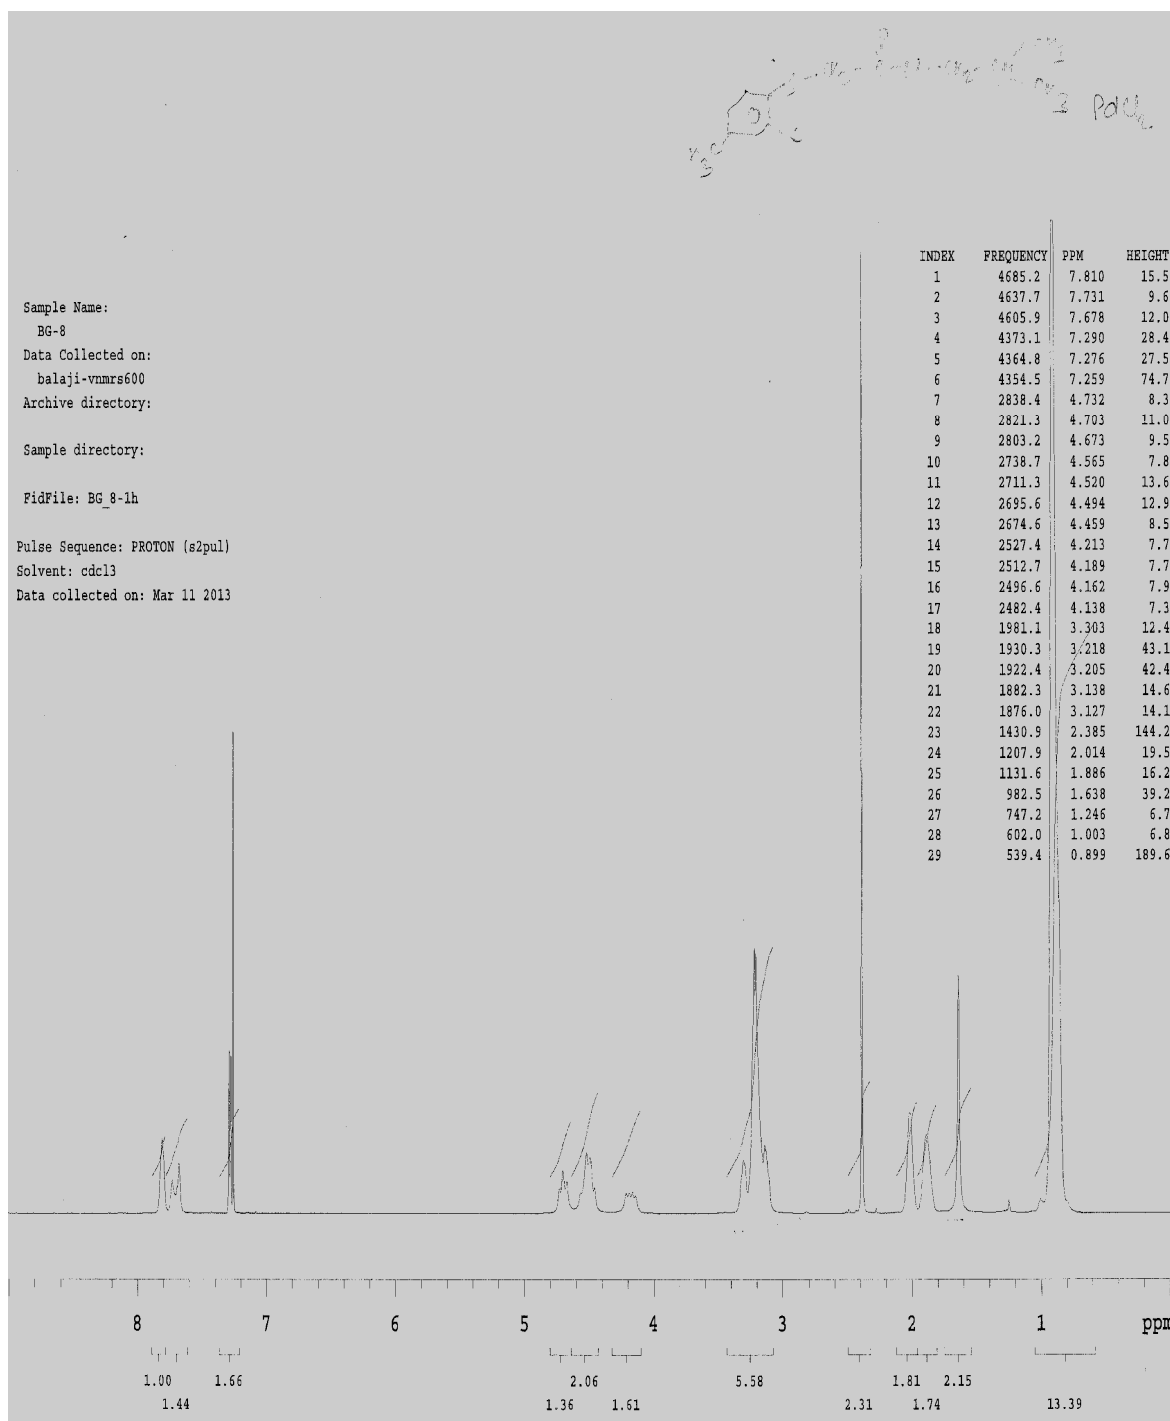

Figure S13: <sup>1</sup>H-NMR spectrum of complex 4

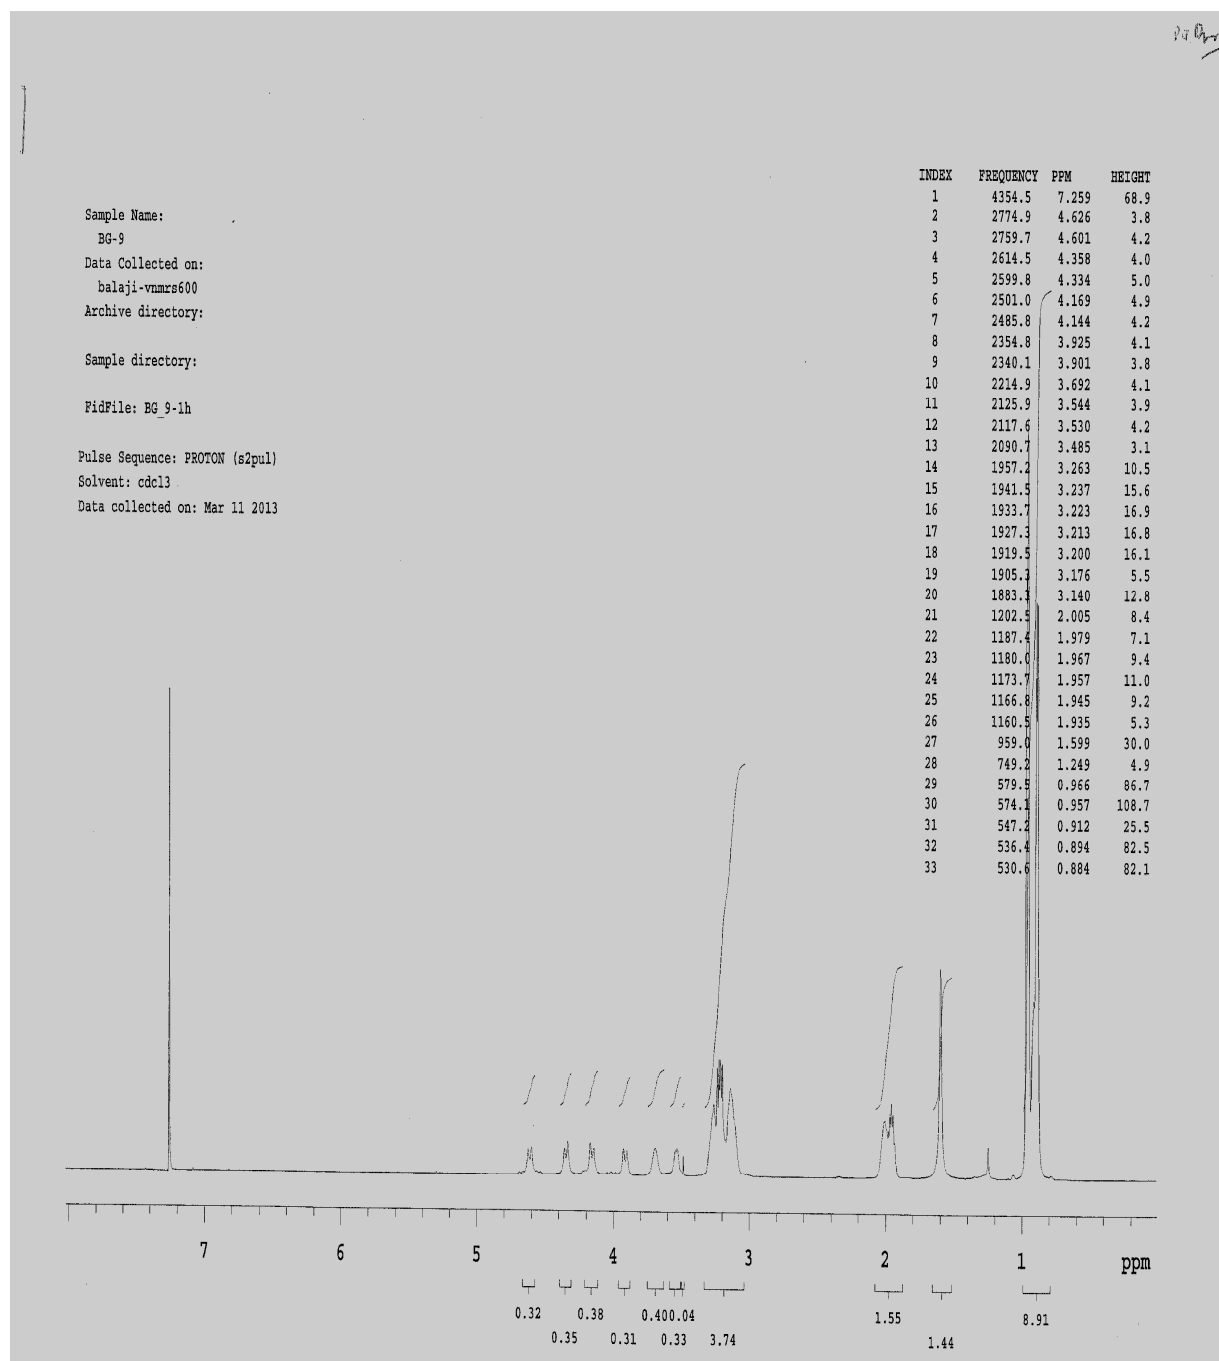

Figure S14:  $^1\text{H}$ -NMR spectrum of complex 5



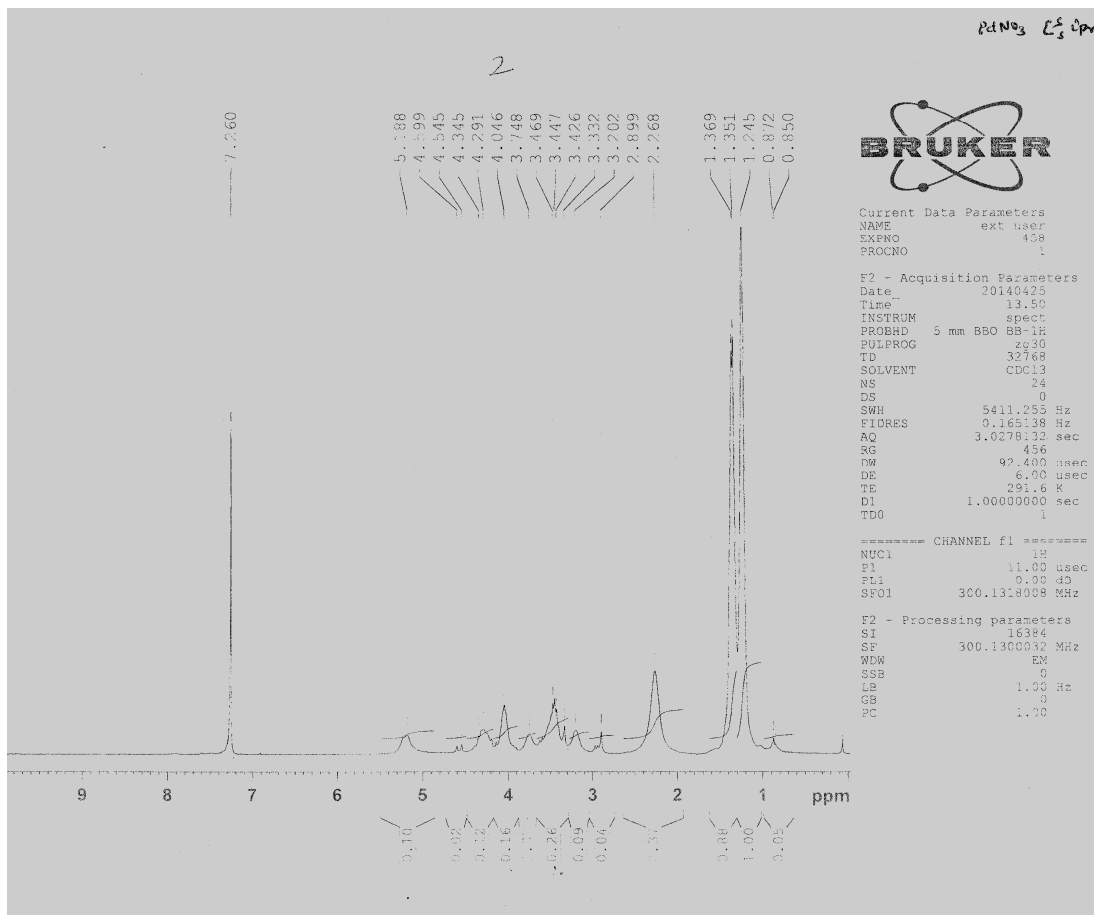

Figure S16: <sup>1</sup>H-NMR spectrum of complex 7

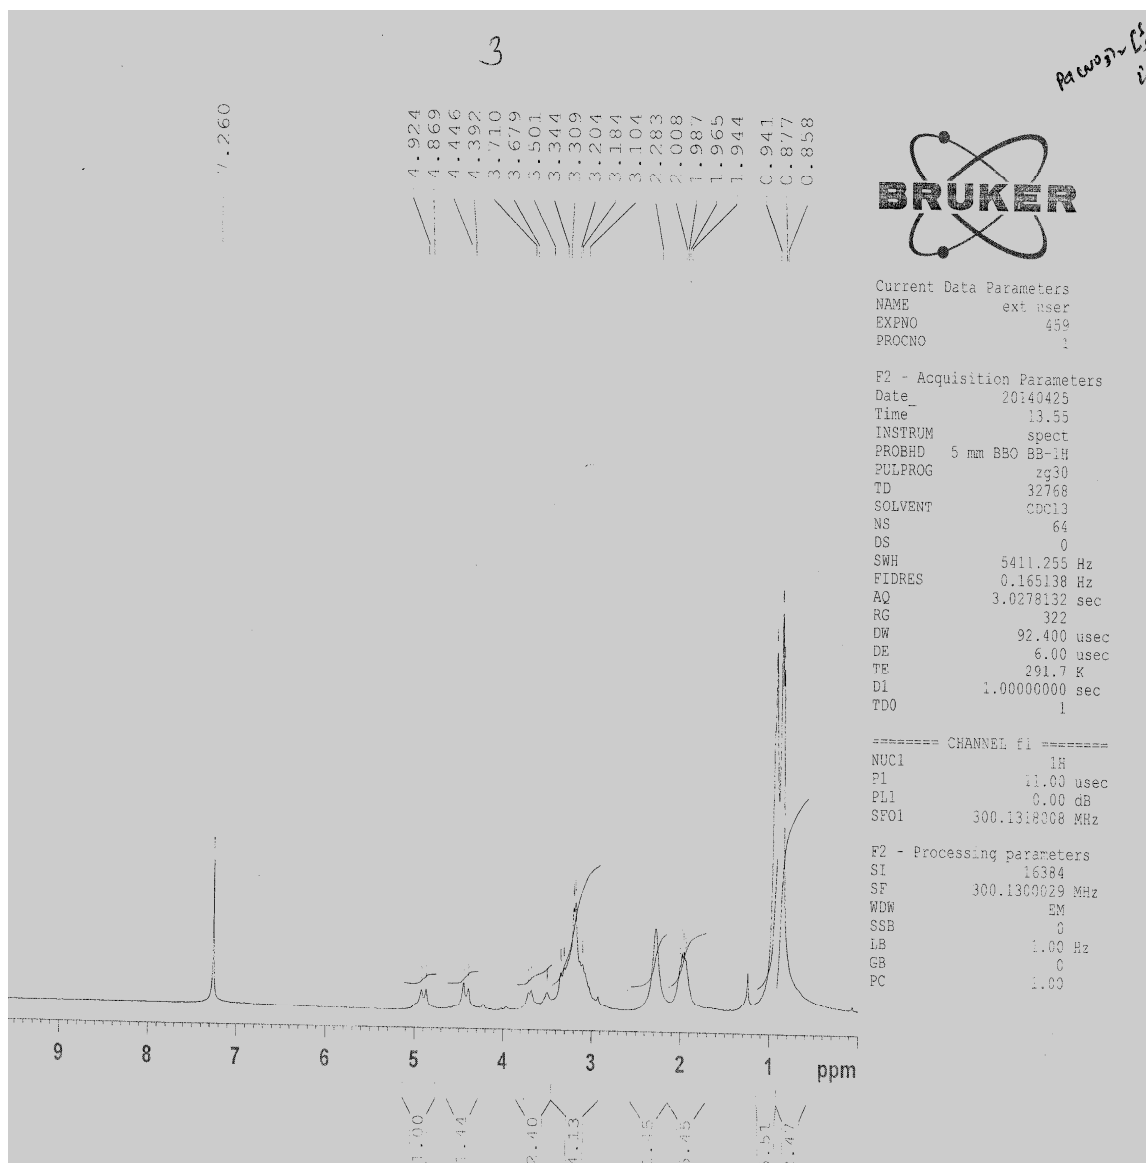

Figure S17:  $^1\text{H}$ -NMR spectrum of complex 8

# Window Display Report

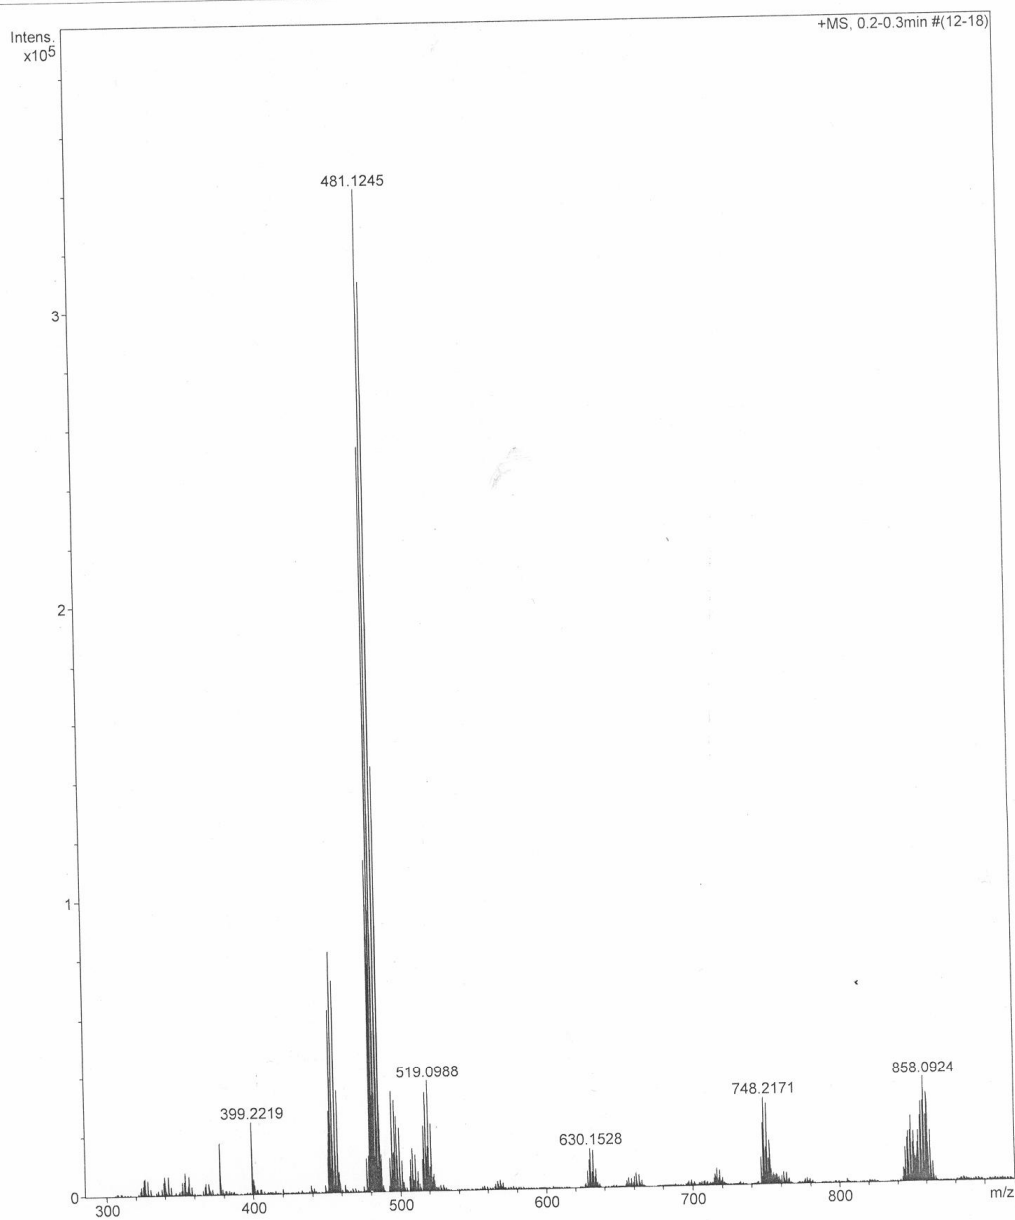

Fig S18 : ESIMS Spectrum of Complex 7

## Window Display Report

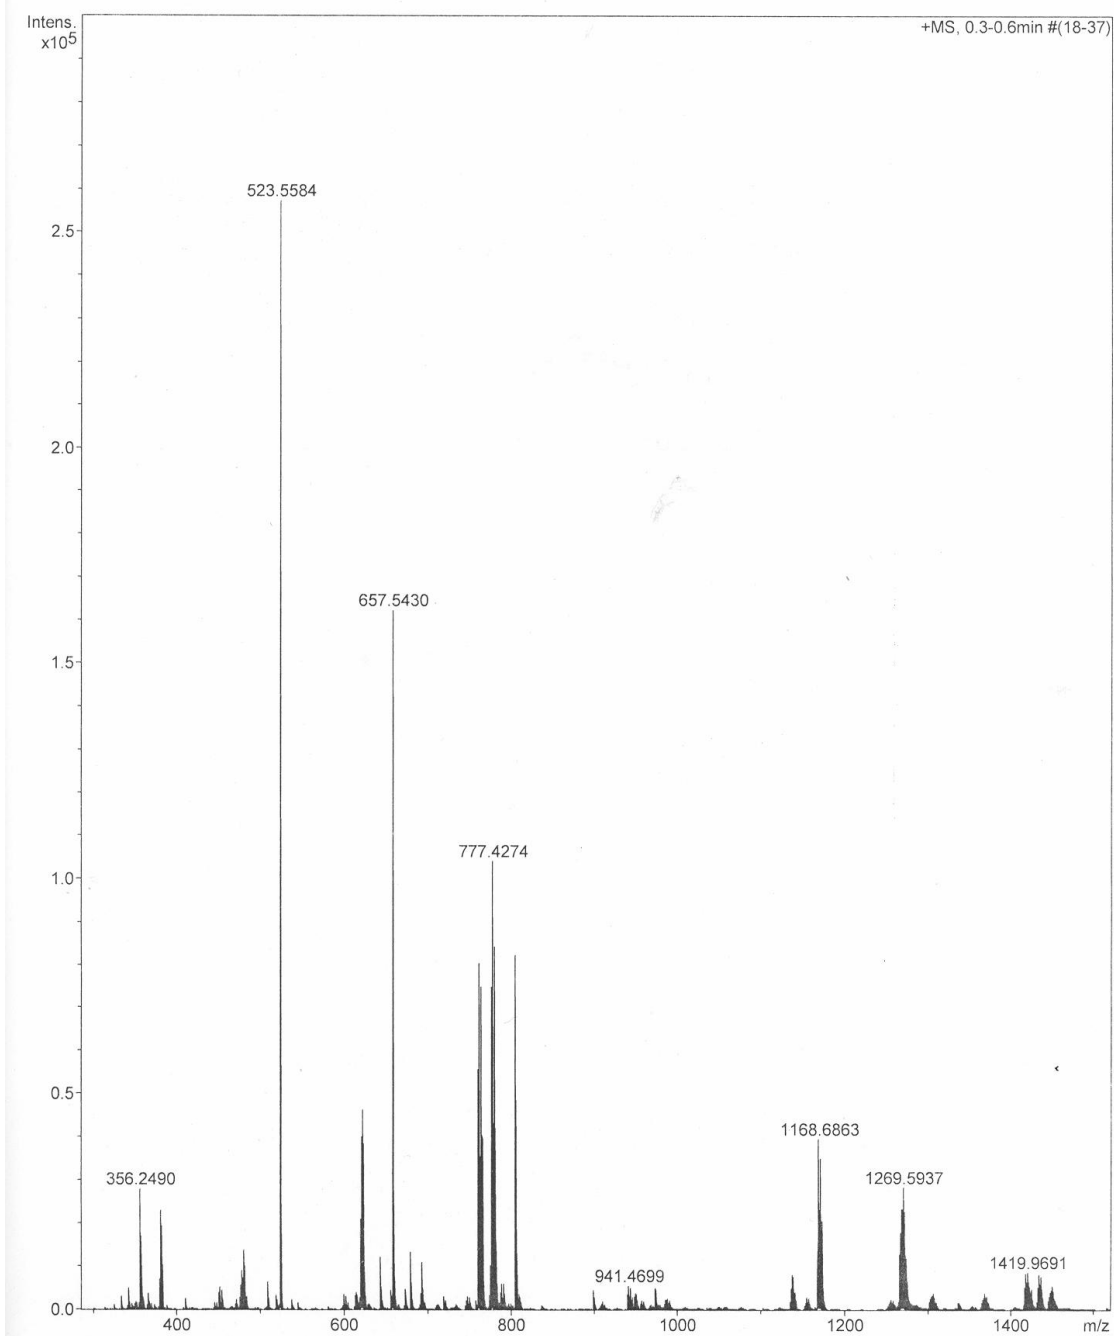

Bruker Compass DataAnalysis 4.0

printed: 4/23/2014 4:49:40 PM

Page 1 of 1

*octyl*

Fig S 19 : The ESI MS spectrum of the dodecane solution after contacting with palladium nitrate solution
